# Supplementary material for: A metal-free yne-addition/1,4-aryl migration/decarboxylation cascade reaction of alkynoates with Csp3–H centers
Source: Royal Society of Chemistry journal article supplement (doi:10.1039/c5ob02478a), 2015-12-23

## Supplementary Information

### **Metal-free yne-addition/aryl migration/decarboxylation cascade reaction of alkynoates with C<sub>sp3</sub>-H centers**

De-Long Kong,<sup>a,b</sup> Liang Cheng,<sup>a</sup> Hong-Ru Wu,<sup>a,b</sup> Yang-Xiong Li,<sup>a,b</sup> Dong Wang<sup>a</sup> and Li Liu,<sup>\*,a</sup>

<sup>†</sup>Beijing National Laboratory for Molecular Sciences (BNLMS), CAS Key Laboratory of Molecular Recognition  
and Function, Institute of Chemistry, Chinese Academy of Sciences, Beijing 100190, China.

E-mail: [lliu@iccas.ac.cn](mailto:lliu@iccas.ac.cn).

<sup>‡</sup>University of Chinese Academy of Sciences, Beijing 100049, China.

### Table of Contents

|                                                                      |    |
|----------------------------------------------------------------------|----|
| 1. General Information.....                                          | S1 |
| 2 Mechanistic studies.....                                           | S2 |
| 2.1 Radical scavenger effect studies.....                            | S2 |
| 2.2 Deuterium-labeling experiment.....                               | S3 |
| 2.3 Kinetic isotope effect studies.....                              | S4 |
| 3. Copies of <sup>1</sup> H NMR and <sup>13</sup> C NMR Spectra..... | S5 |

## General Information:

All chemicals were obtained from commercial sources and were used as received unless otherwise noted. Alkynoate were prepared according to original or modified literature procedures. All reactions were carried out in flame-dried reaction vessels with Teflon screw caps under a nitrogen atmosphere by using standard Schlenk techniques. Anhydrous solvents were purified and dried following standard procedures. TLC analysis was performed on pre-coated, glass-backed silica gel plates and visualized with UV light. Column chromatography was performed on silica gel(200-300 mesh) using ethyl acetate (EA)/petroleum ether (PE). <sup>1</sup>H-NMR and <sup>13</sup>C-NMR Spectra were obtained on a Bruker 300 MHz, 400MHz or 500 MHz NMR spectrometer in the deuterated solvents indicated Chemical shifts are reported in ppm from tetramethylsilane with the solvent resonance as the internal standard. The following abbreviations were used to designate chemical shift multiplicities: s= singlet, d= doublet, t= triplet, q= quartet, h= heptet, m= multiplet,. All first-order splitting patterns were assigned on the basis of the appearance of the multiplet. Splitting patterns that could not be easily interpreted are designated as multiplet (m) or broad (br). Melting points were measured on Beijing Tech X-4 apparatus without correction. IR spectra were recorded on a Nicolet 6700 FT-IR spectrometer. HRMS Mass spectra were obtained using electrospray ionization (ESI) or atmospheric pressure chemical ionization (APCI) mass spectrometer.

## 2. Mechanistic studies

### 2.1 Radical scavenger effect studies

To gain insight into the pathway of the present reaction, we conducted some control experiments under the standard reaction conditions. Radical scavengers, TEMPO, were employed in the standard reaction, and no desired product was detected. This result suggested that a single electron transfer process (SET) was involved in the reaction.

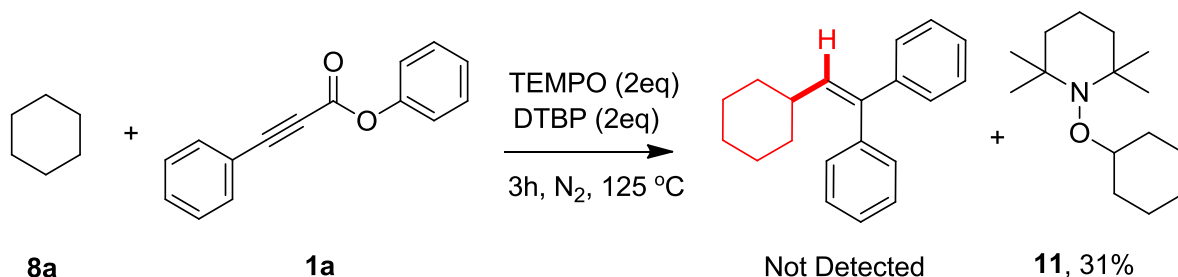

<sup>a</sup>Reaction conditions: 1a (0.2 mmol), DTBP (0.4 mmol), TEMPO(0.5 mmol), 4 mL of cyclohexane as solvent, 125 °C, 12h.

## 2.2 Deuterium-labeling experiment

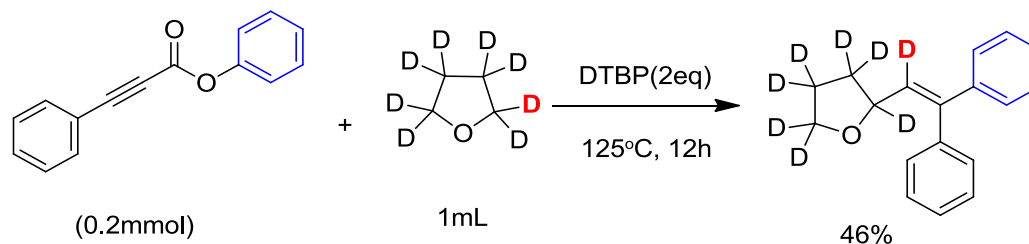

Mixture of THF-D<sub>8</sub> (1 mL), **1a** (0.2mmol) and DTBP (0.4 mmol) was sealed in a Teflon septum screw-capped tube under N<sub>2</sub>. The mixture was stirred in an oil bath at 125 °C for 12 h. The corresponding reaction mixture was purified by flash column chromatography on a silica gel to give the desired product in 46% yield. The <sup>1</sup>NMR (in CD<sub>3</sub>OD) was described in details as follows.

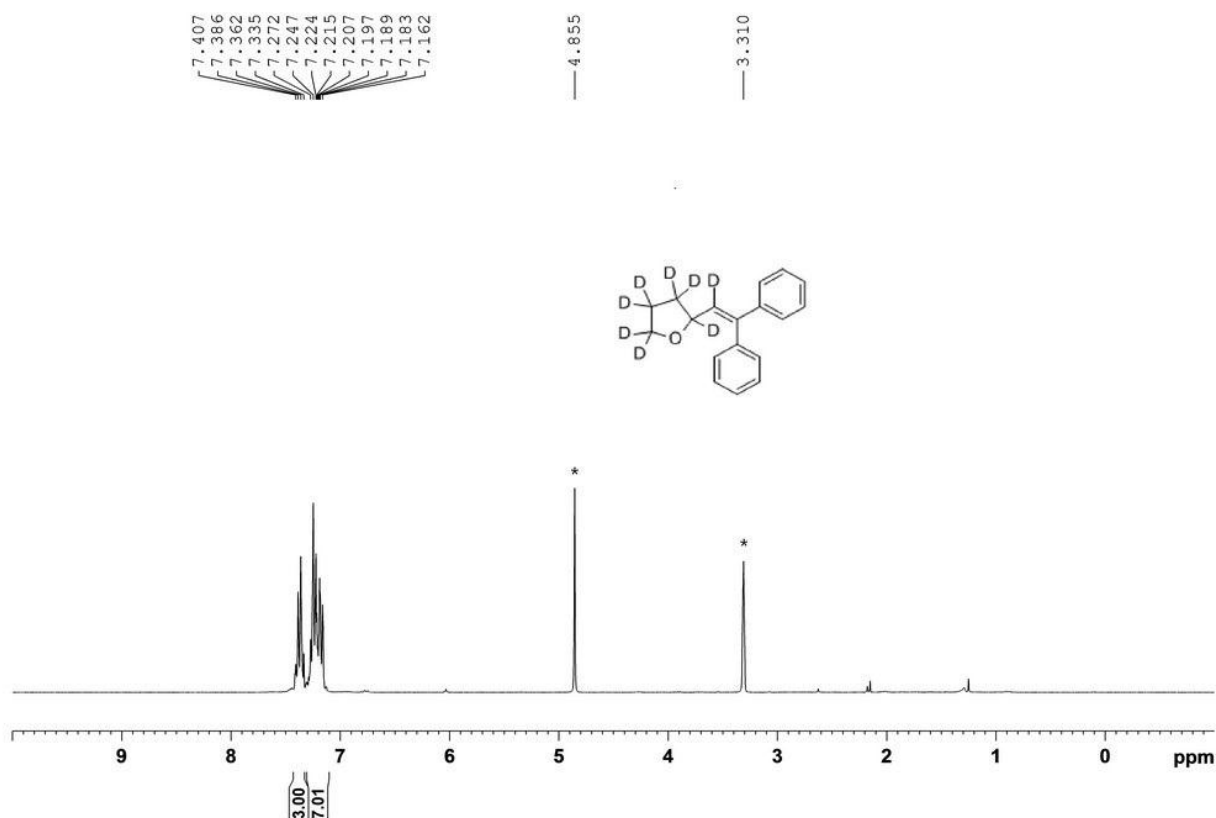

The addition of *t*-BuOD (2 eq) to the reaction mixture of **1a** with **8a** on the standard condition did not lead to any deuterium-containing products thus practically ruling out the possibility that the terminal hydrogen abstraction step of the tandem reaction might be involved by *t*-BuOH formed from homo-cleavage of DTBP.

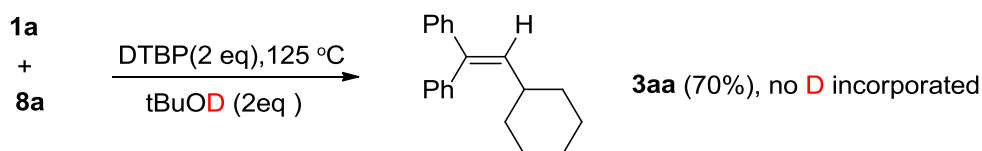

### 2.3 Kinetic isotope effect studies

THF (2 mL, 25 mmol), **1a** (0.2 mmol) and DTBP (0.4 mmol) was sealed in a Teflon septum screw-capped tube under N<sub>2</sub>. Same procedures was operated with THF-D<sub>12</sub>. The mixture was stirred in an oil bath at 125 °C for 1.5 h. After completion of the reactions, the mixtures were detected by GC analysis with dibenzofuran as the internal standard. As a result, the desired coupling products were obtained in 82% and 39% yields, respectively, in which  $k_H/k_D = 2.1$ .

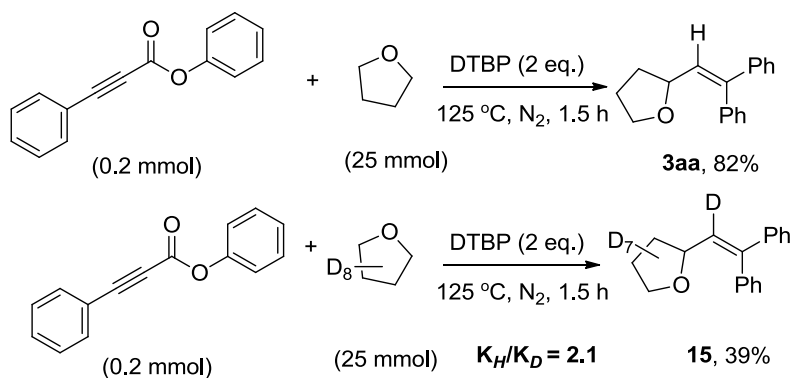

### 3. Copies of $^1\text{H}$ NMR and $^{13}\text{C}$ NMR

#### 3aa

kdl-142-H

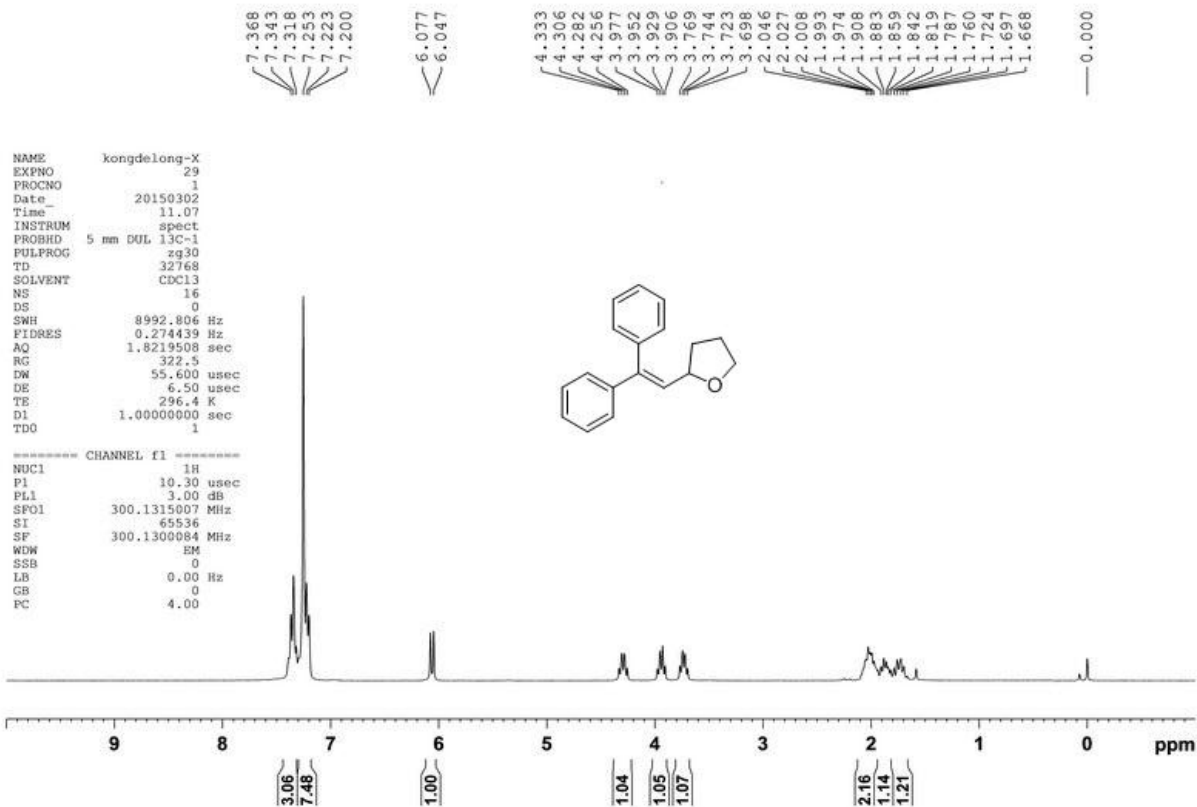

kdl-142-C

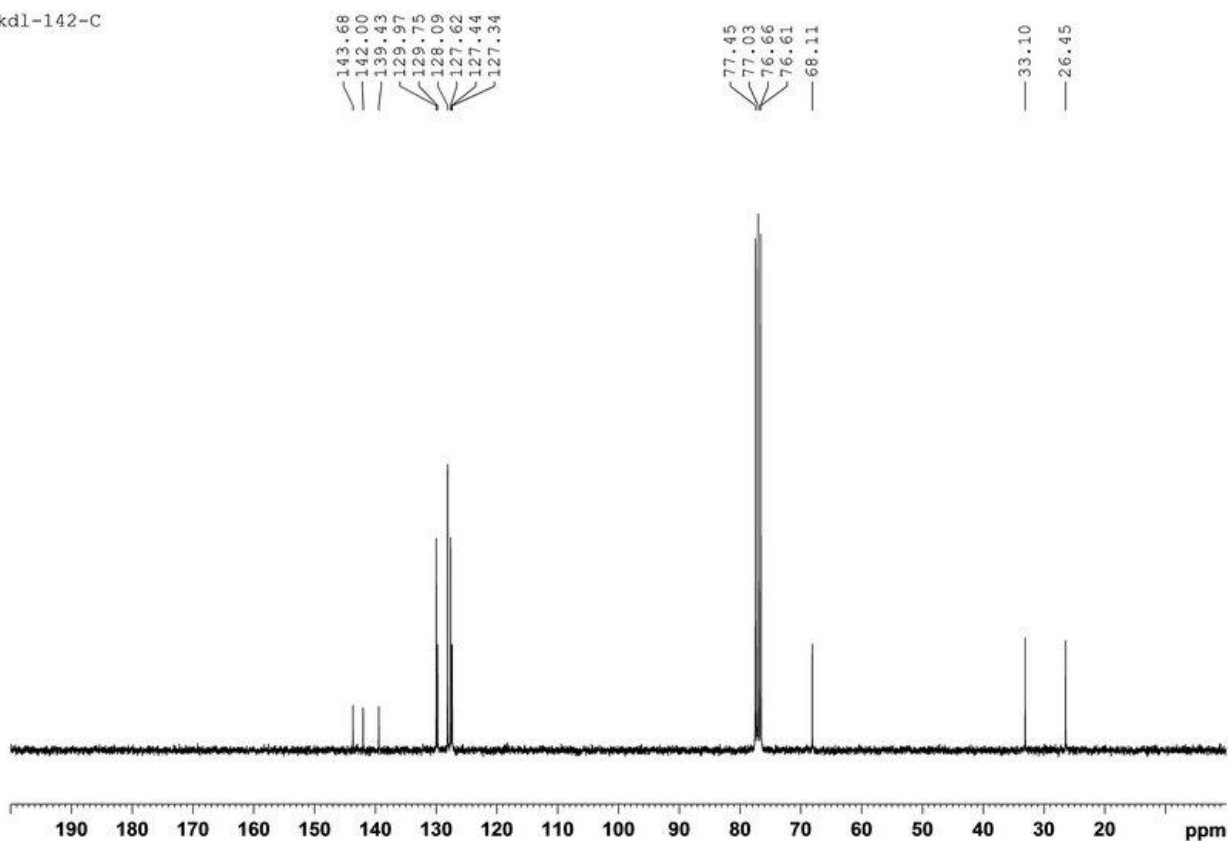

### 3ab

kdl-183-H

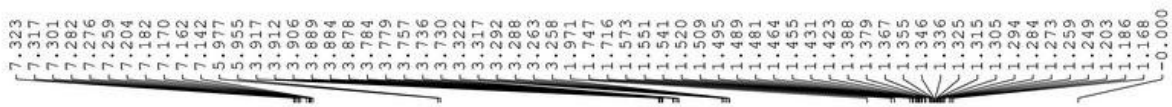

```

NAME          kdi-183
EXPNO         3
PROCNO        1
Date_         20150406
Time          17.35
INSTRUM       spect
PROBHD        5 mm PABBO BB/
PULPROG       zg30
TD            32768
SOLVENT       CDC13
NS            16
DS            0
SWH           8012.820 Hz
FIDRES        0.244532 Hz
AQ            2.0447731 sec
RG            125.02
DW            62.400 usec
DE            6.50 usec
TE            298.1 K
D1            2.00000000 sec
TDO           1
  
```

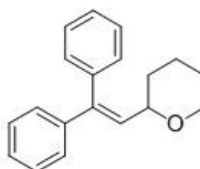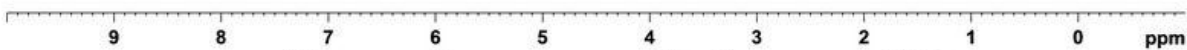

kdl-183-C

3.42  
 7.73  
 1.11  
 1.09  
 1.04  
 1.17  
 3.59  
 2.64  
 143.49  
 142.07  
 139.64  
 129.86  
 129.81  
 128.10  
 128.08  
 127.64  
 127.44  
 127.34  
 77.35  
 77.04  
 76.72  
 75.69  
 67.92  
 32.29  
 25.72  
 23.14

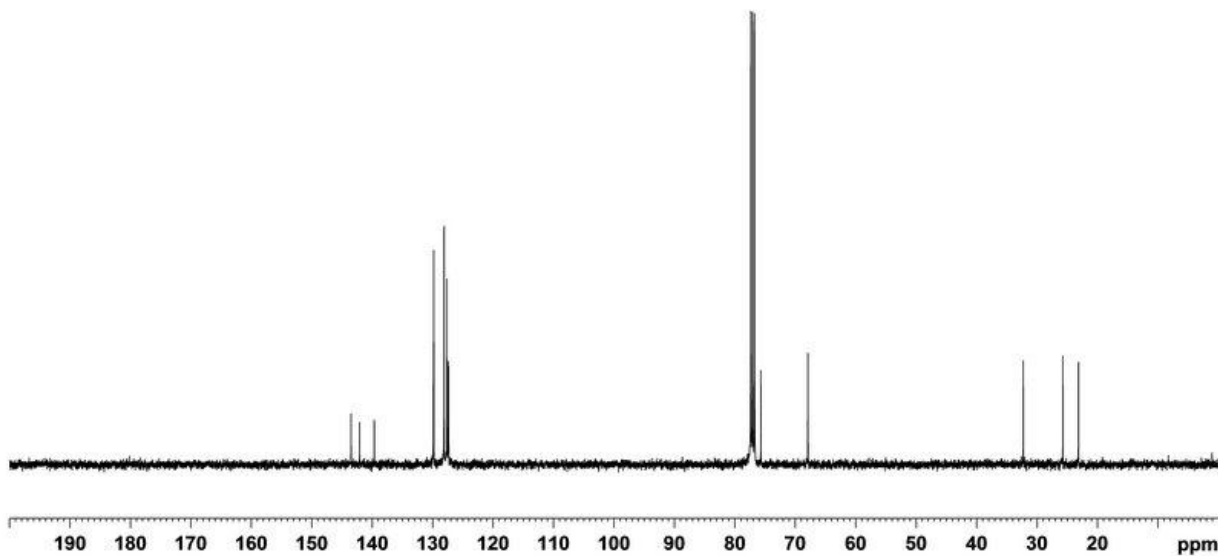

### 3ac

kdl-180-H

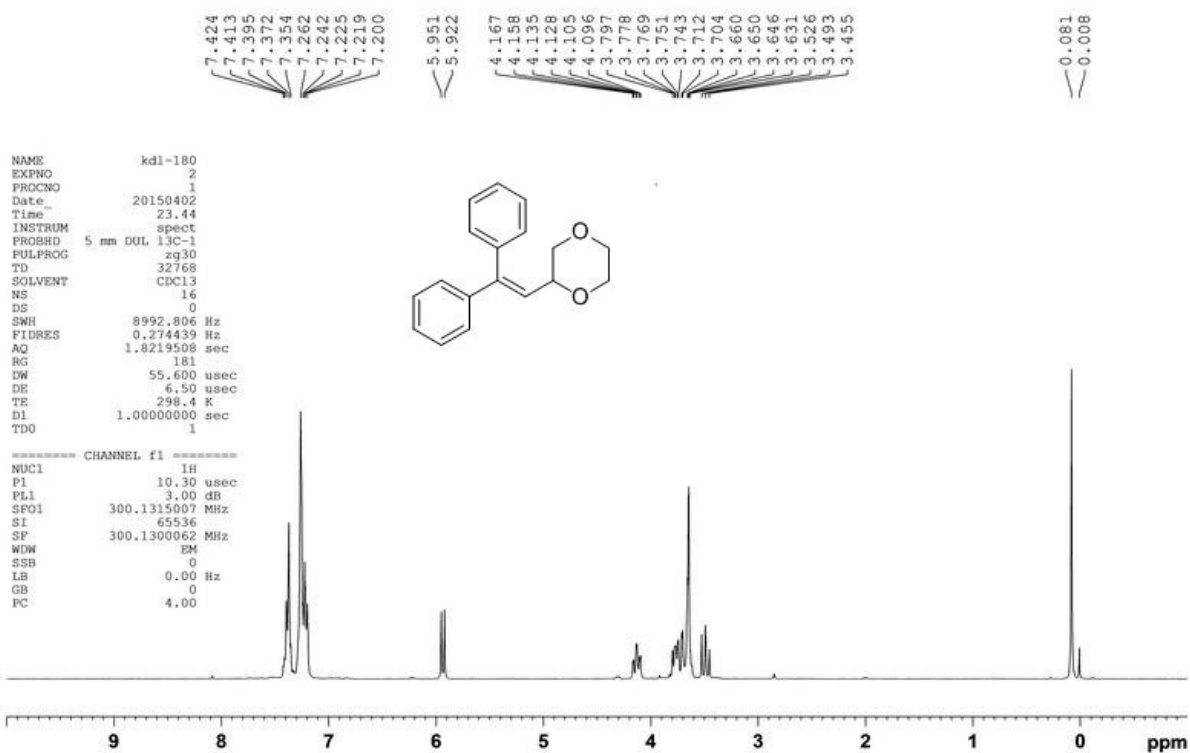

kdl-180-C

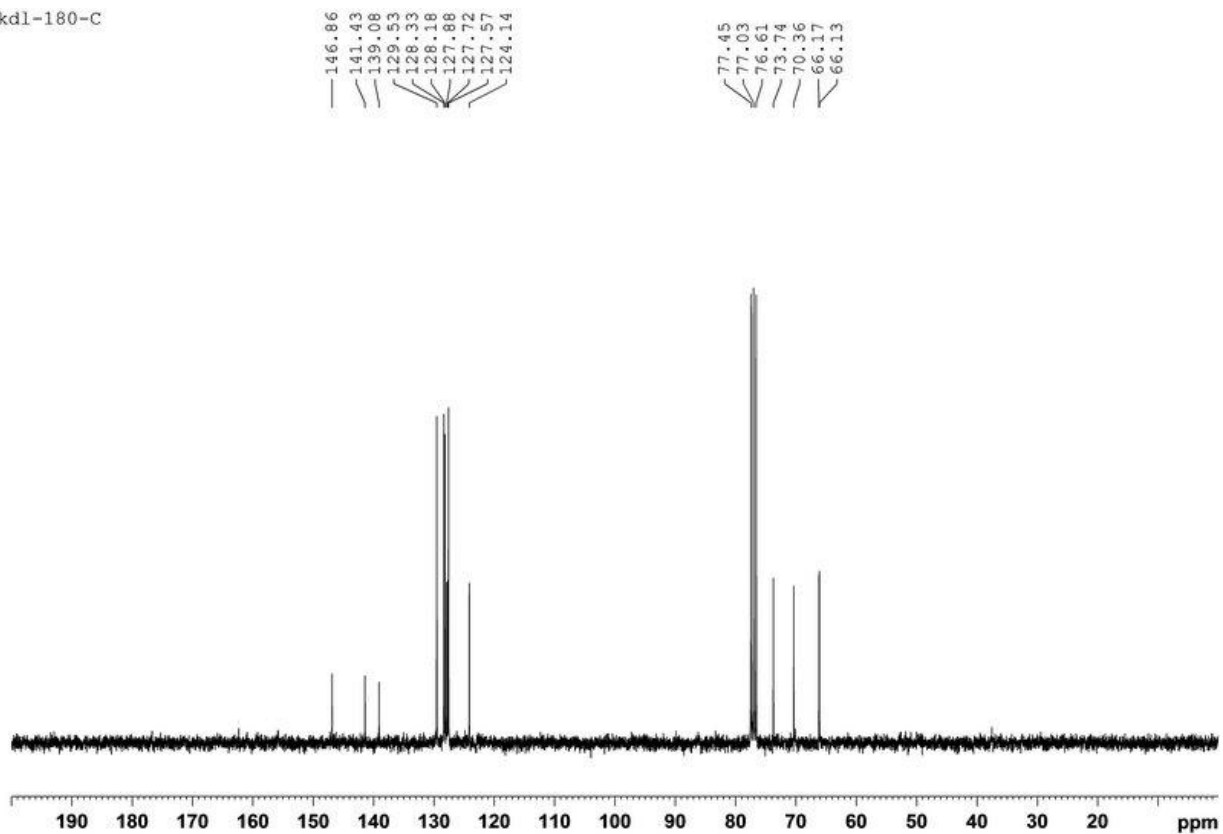

### 3d

kdl-177-H

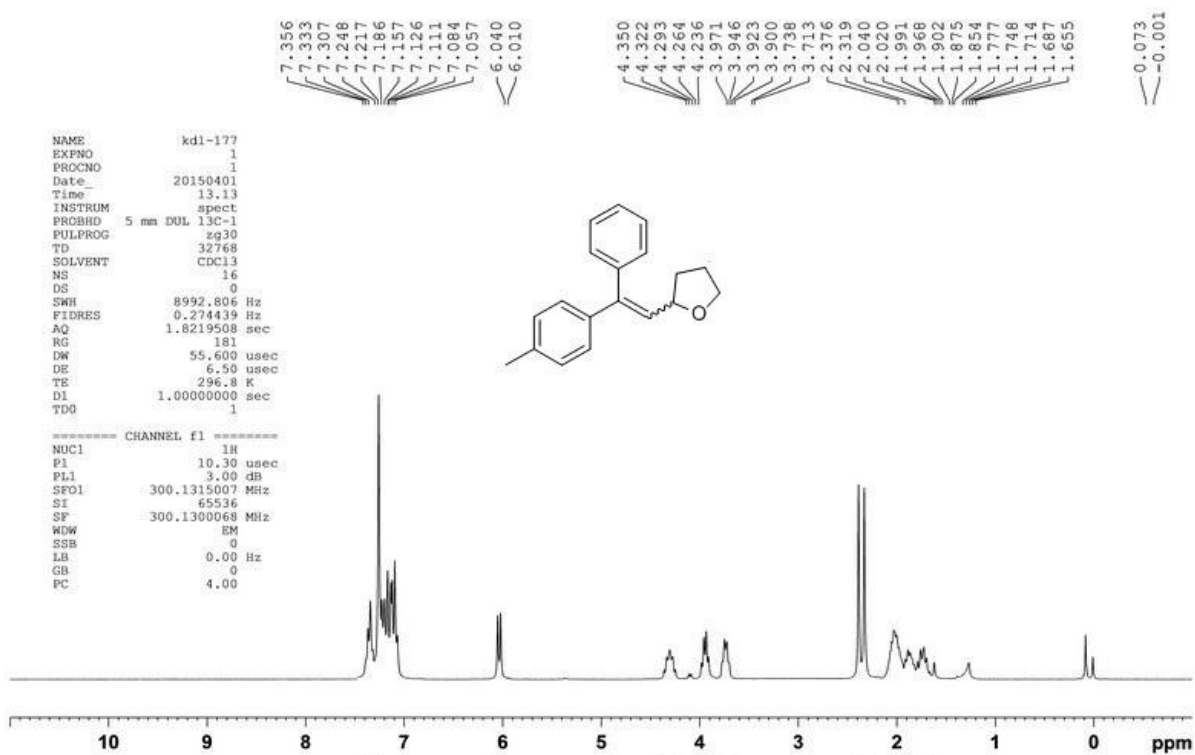

```

NAME          kdl-177
EXPNO         1
PROCNO        1
Date_         20150401
Time          13.13
INSTRUM       spect
PROBHD        5 mm DUL 13C-1
PULPROG       zg30
TD            32768
SOLVENT       CDCl3
NS            16
DS            0
SWH           8992.806 Hz
FIDRES        0.274439 Hz
AQ            1.8219508 sec
RG            181
DW            55.600 usec
DE            6.50 usec
TE            296.8 K
D1            1.00000000 sec
TDQ           1
----- CHANNEL f1 -----
NUC1          1H
P1            10.30 usec
PL1           3.00 dB
SFO1          300.1315007 MHz
SI            65536
SF            300.1300068 MHz
WDW           EM
SSB           0
LB            0.00 Hz
GB            0
PC            4.00
    
```

kdl-177-C

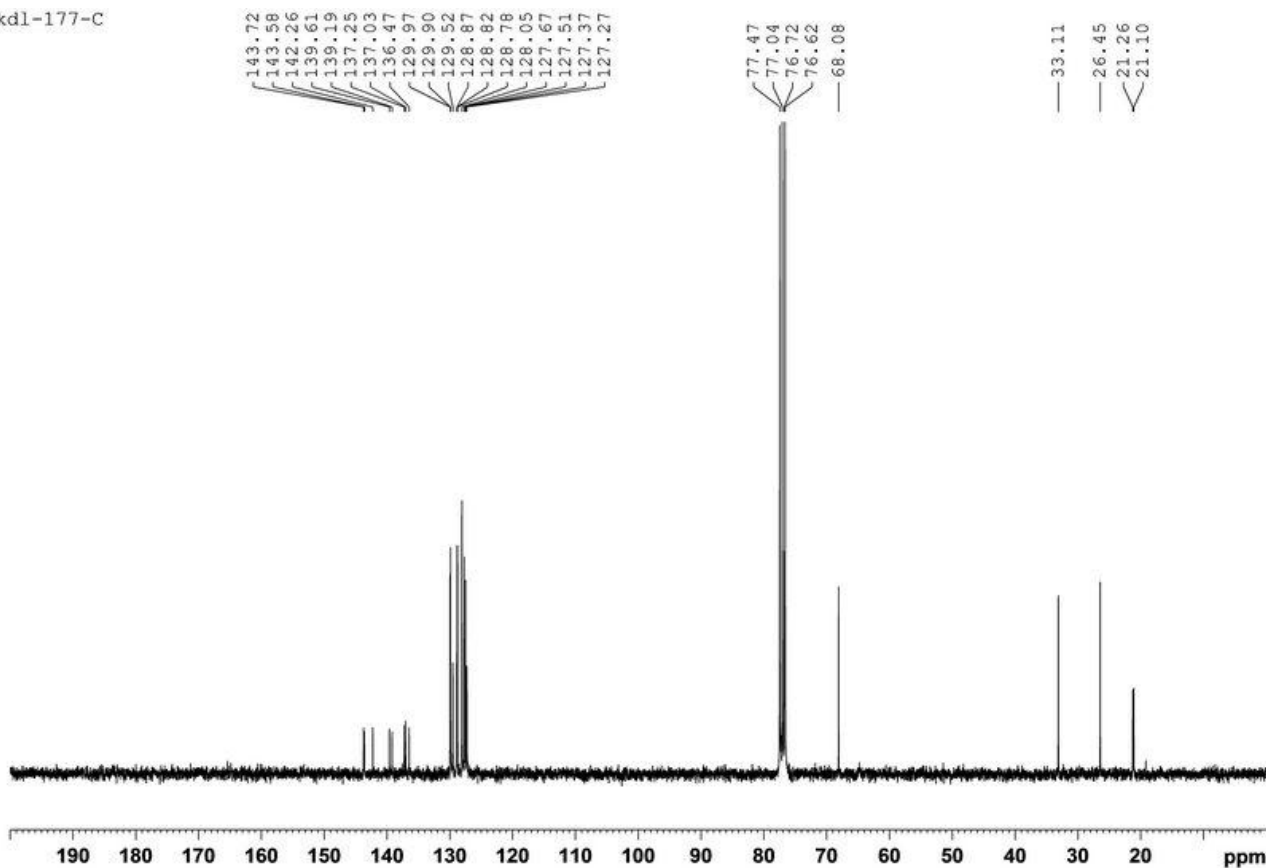



3e

kdl-194-H

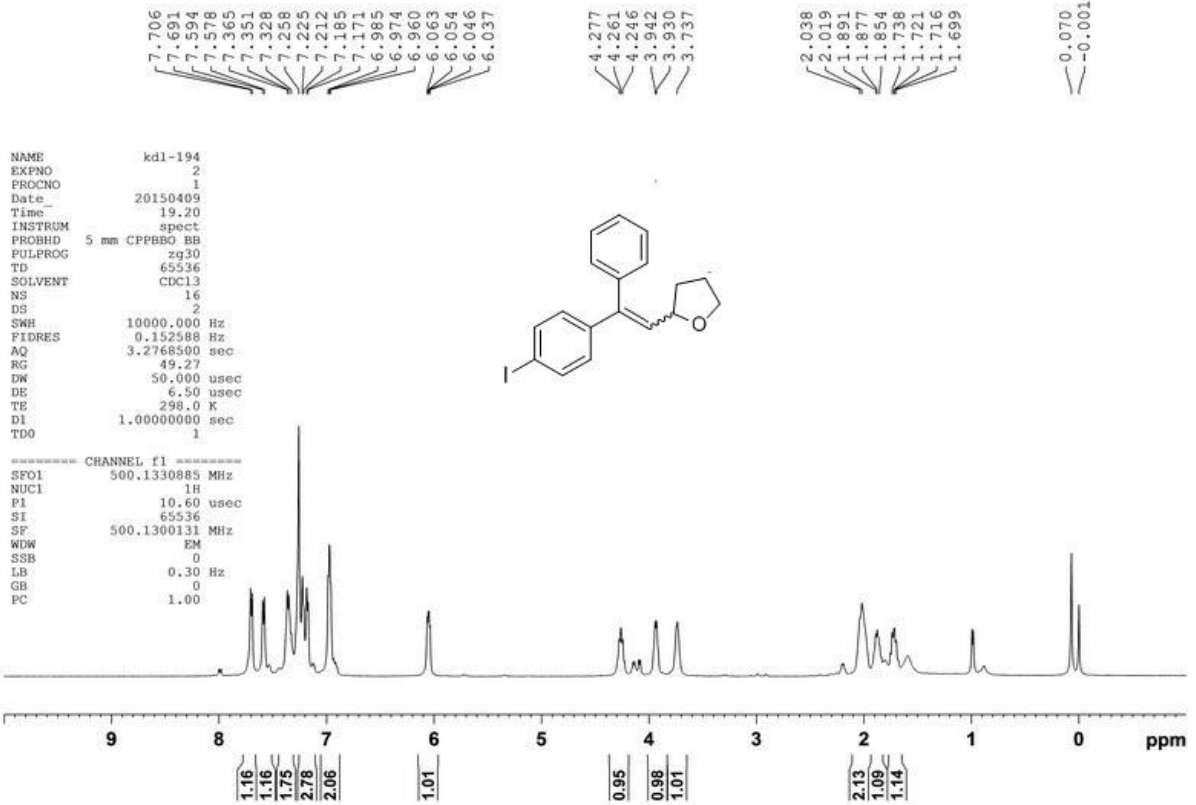

NAME kdl-194  
 EXPNO 2  
 PROCNO 1  
 Date\_ 20150409  
 Time 19.20  
 INSTRUM spect  
 PROBHD 5 mm CFPBBO BB  
 PULPROG zg30  
 TD 65536  
 SOLVENT CDCl3  
 NS 16  
 DS 2  
 SWH 10000.000 Hz  
 FIDRES 0.152588 Hz  
 AQ 3.2768500 sec  
 RG 49.27  
 DW 50.000 usec  
 DE 6.50 usec  
 TE 298.0 K  
 D1 1.00000000 sec  
 TDO 1

----- CHANNEL f1 -----  
 SFO1 500.1330885 MHz  
 NUCL1 1H  
 P1 10.60 usec  
 SI 65536  
 SF 500.1300131 MHz  
 WDW EM  
 SSB 0  
 LB 0.30 Hz  
 GB 0  
 PC 1.00

kdl-194-C

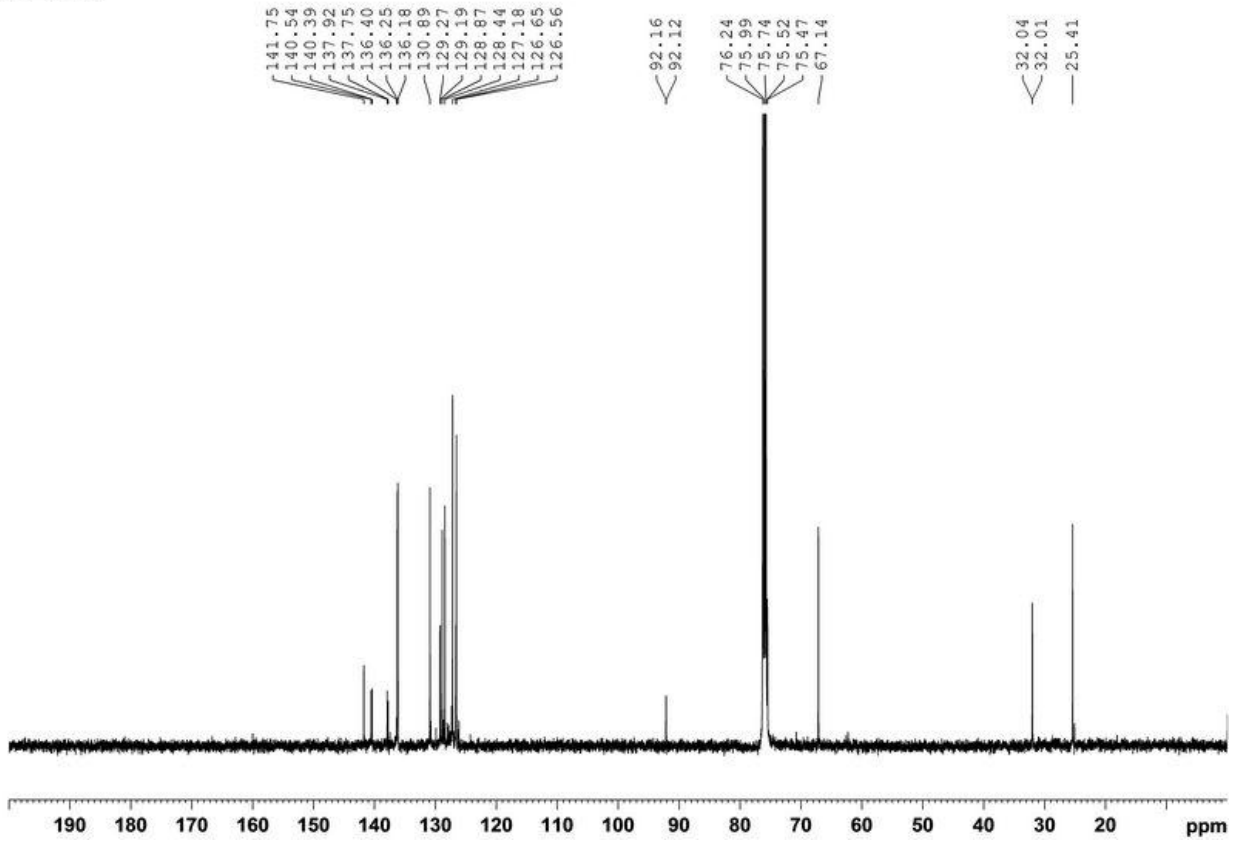

3f

kd1-213-THF-H

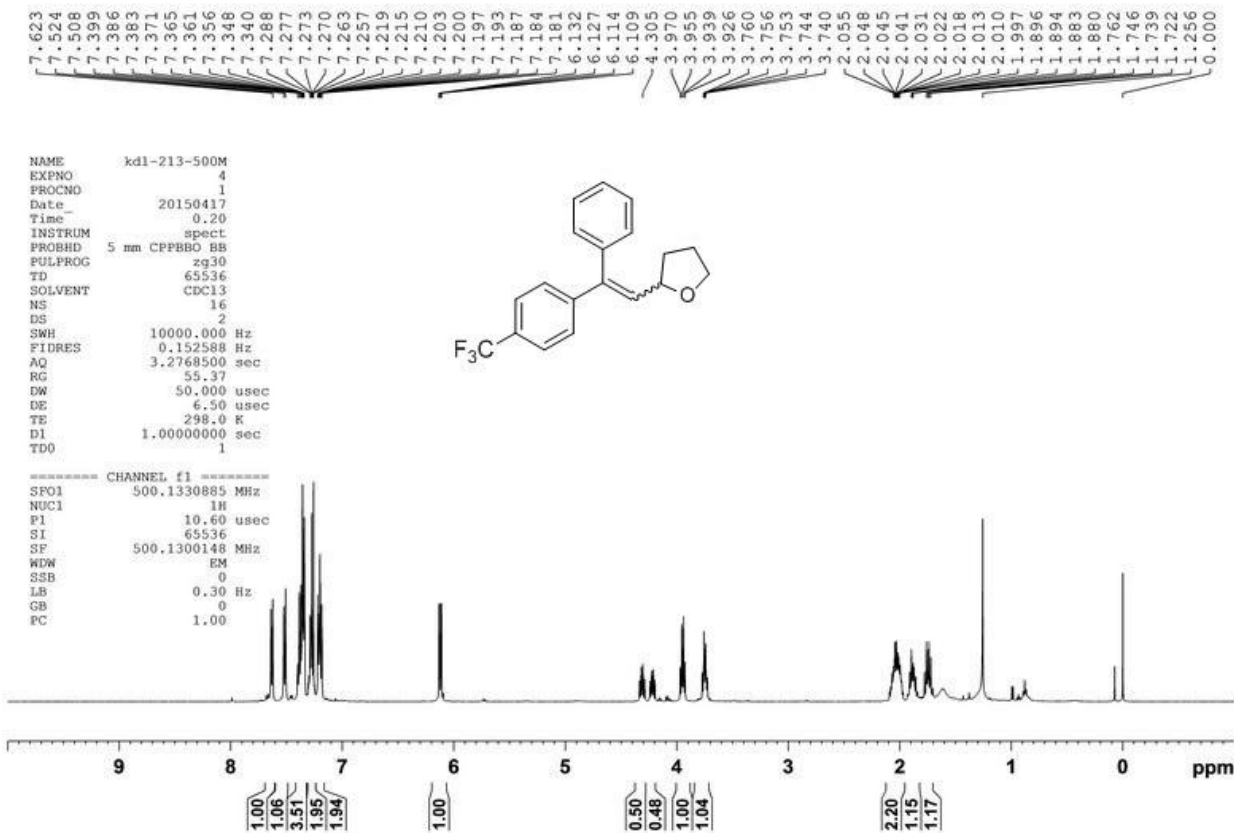

kd1-213-THF-C

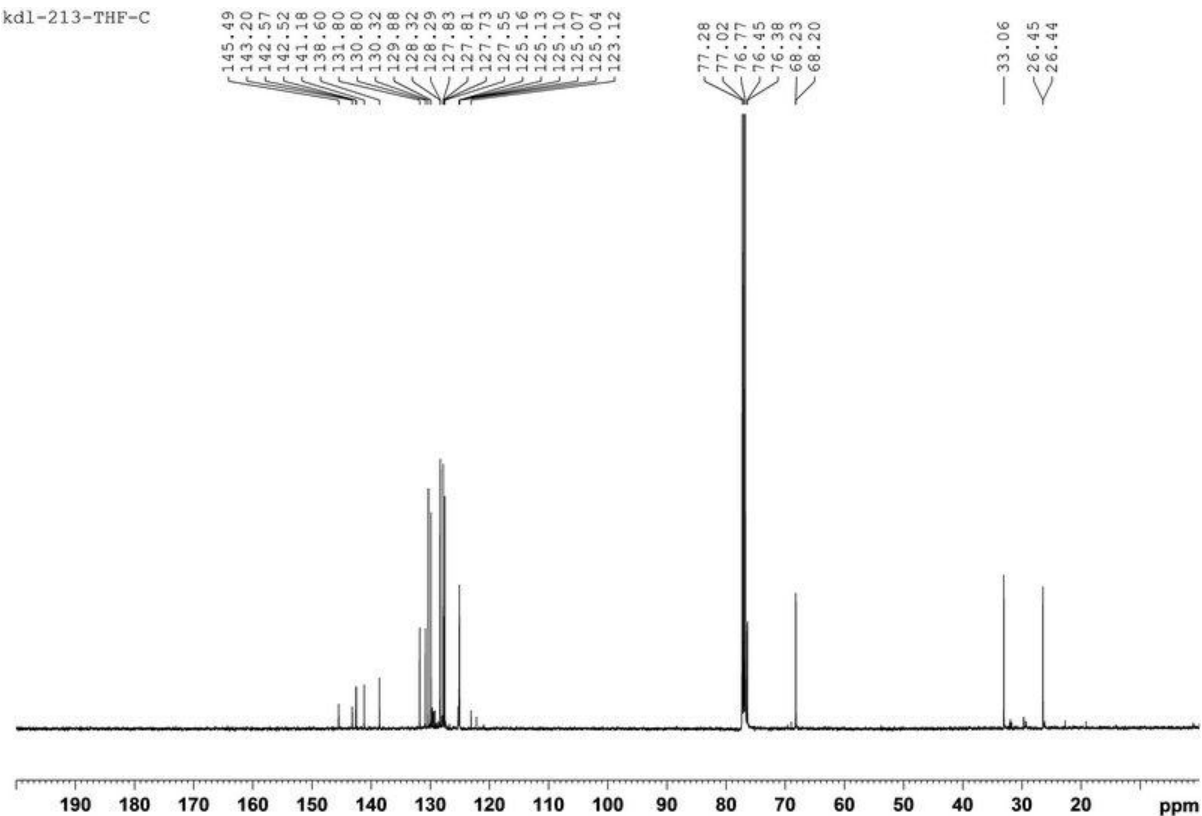

3g

kdl-217-thf-hun

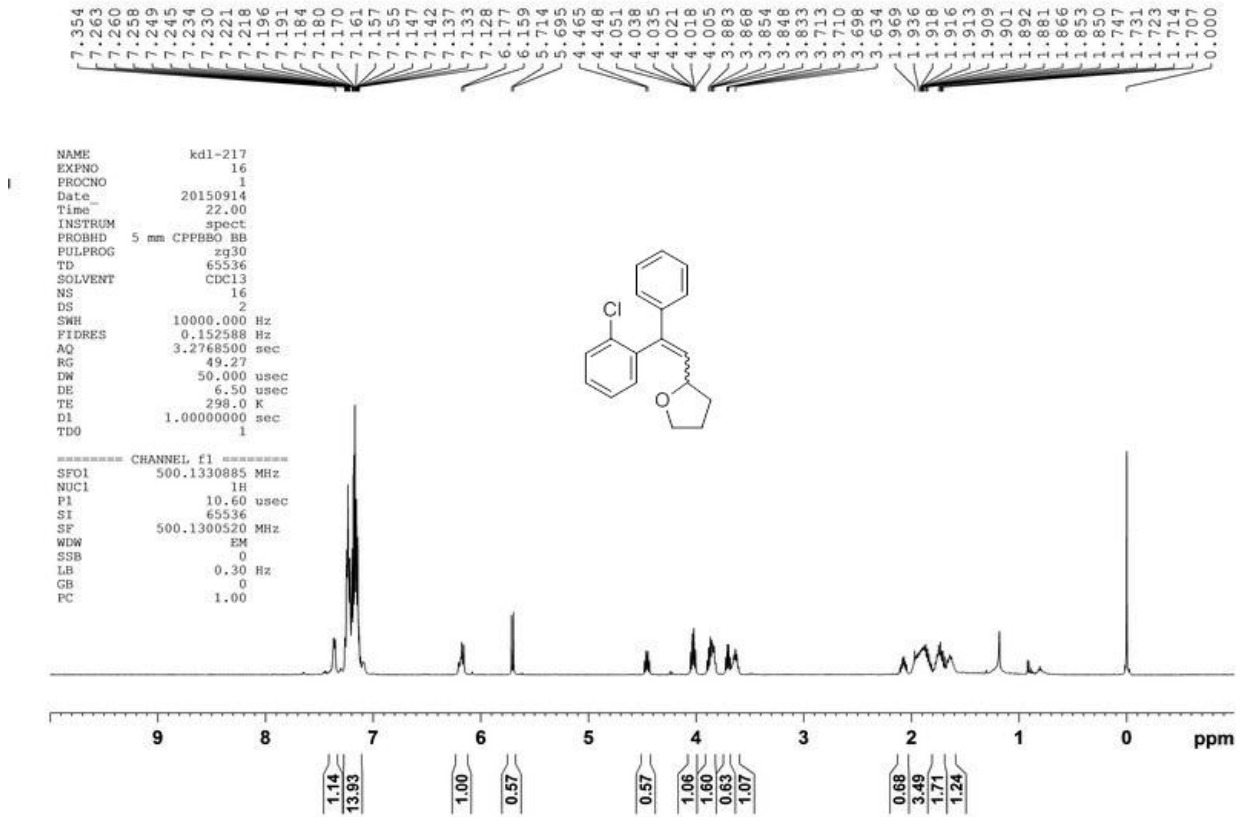

kdl-217-thf-hun-c

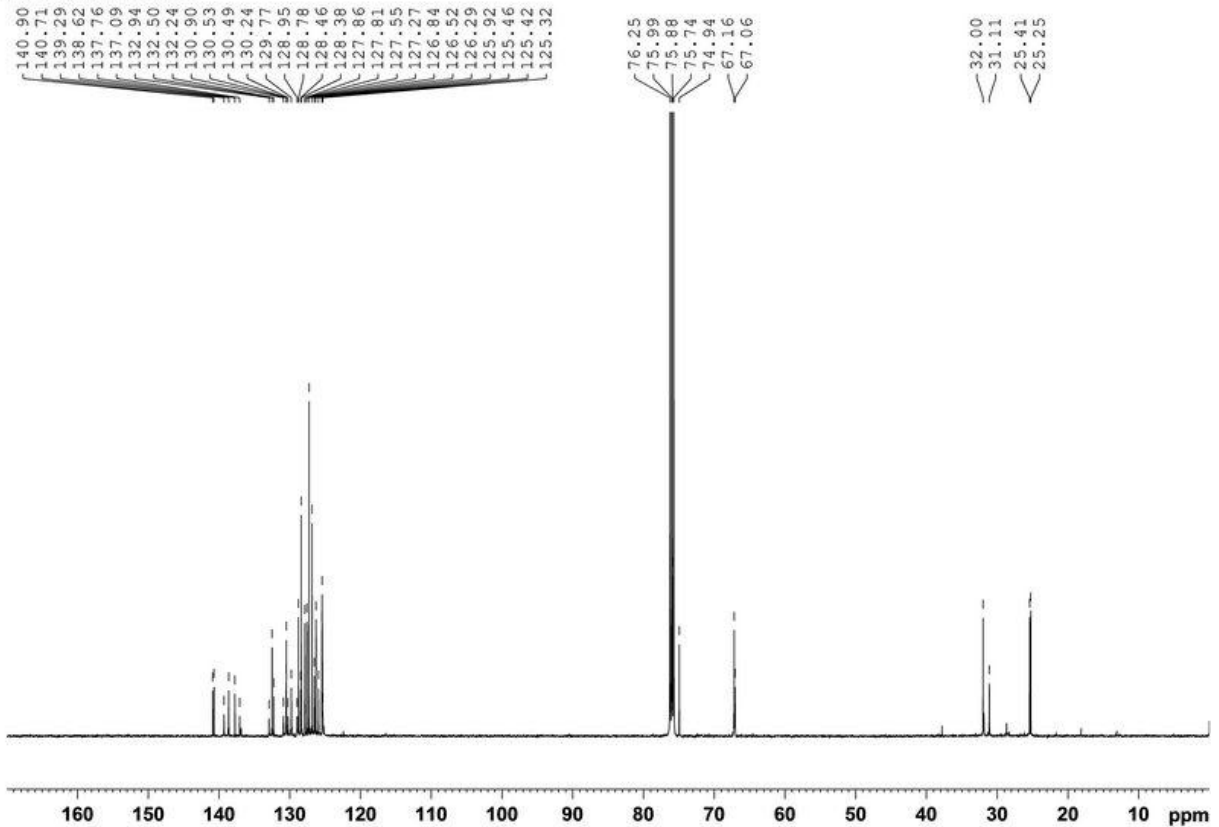

### 3h

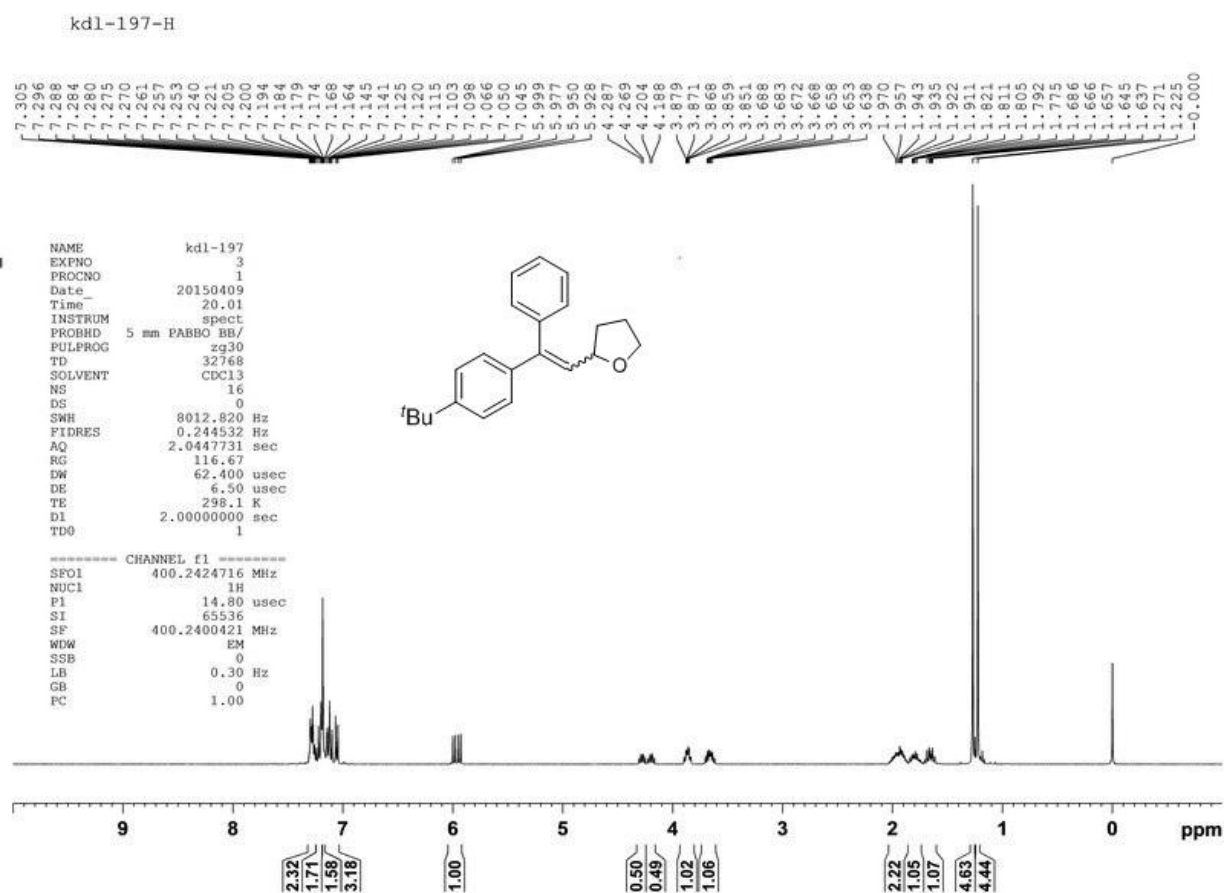

kdl-197-C

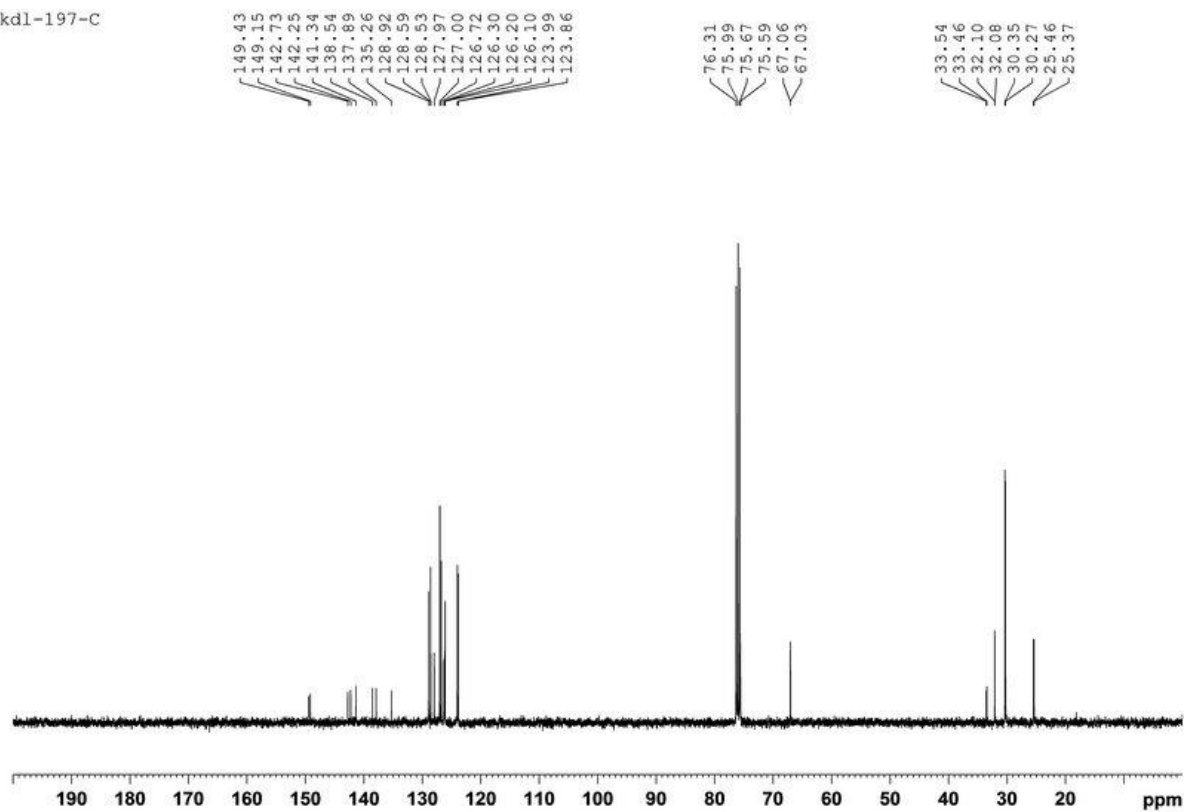

# 5aa

kdl-163-H-DMF-qianyi

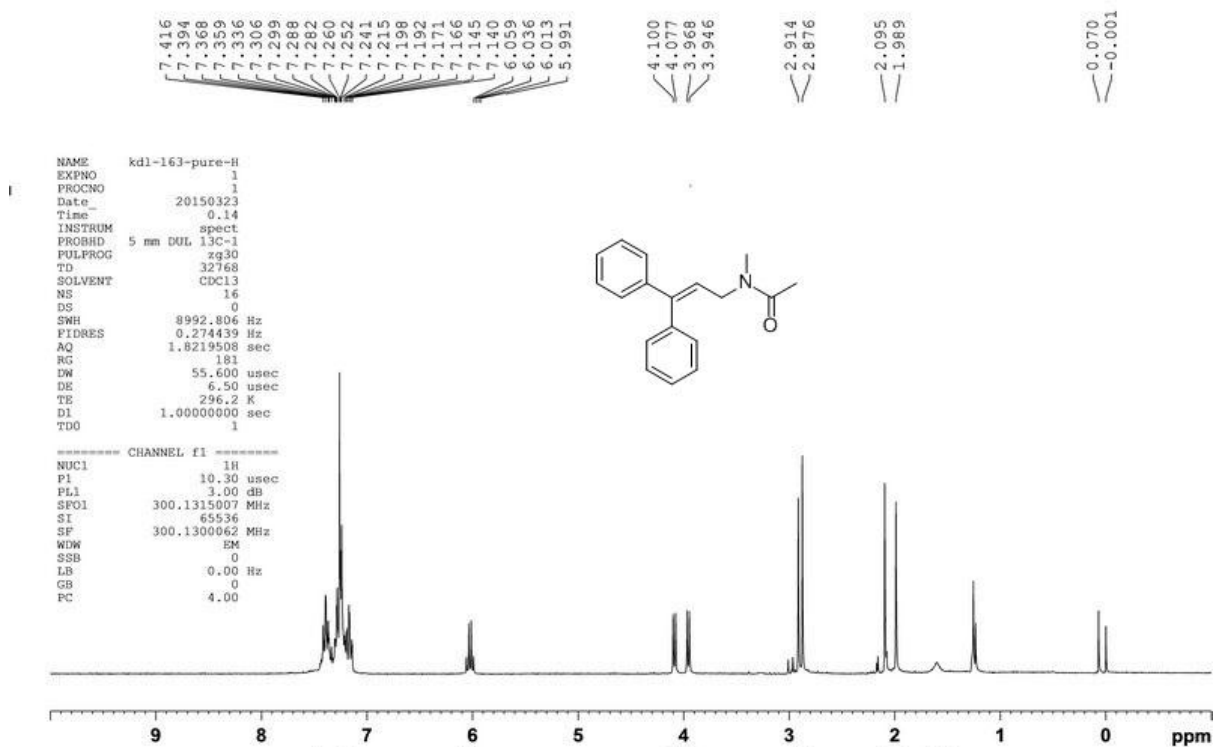

```

NAME      kdl-163-pure-H
EXPNO     1
PROCNO    1
Date_     20150323
Time      0.14
INSTRUM   spect
PROBHD    5 mm DUL 13C-1
PULPROG   zg30
TD         32768
SOLVENT   CDCl3
NS         16
DS         0
SWH       8992.806 Hz
FIDRES    0.274439 Hz
AQ         1.8219508 sec
RG         181
DW         55.600 usec
DE         6.50 usec
TE         296.2 K
DI         1.00000000 sec
TDO        1

----- CHANNEL f1 -----
NUC1      1H
PI        10.30 usec
PL1       3.00 dB
SFO1      300.1315007 MHz
SI        65536
SF        300.1300062 MHz
WDW       EM
SSB       0
LB        0.00 Hz
GB        0
PC        4.00
    
```

kdl-163-C

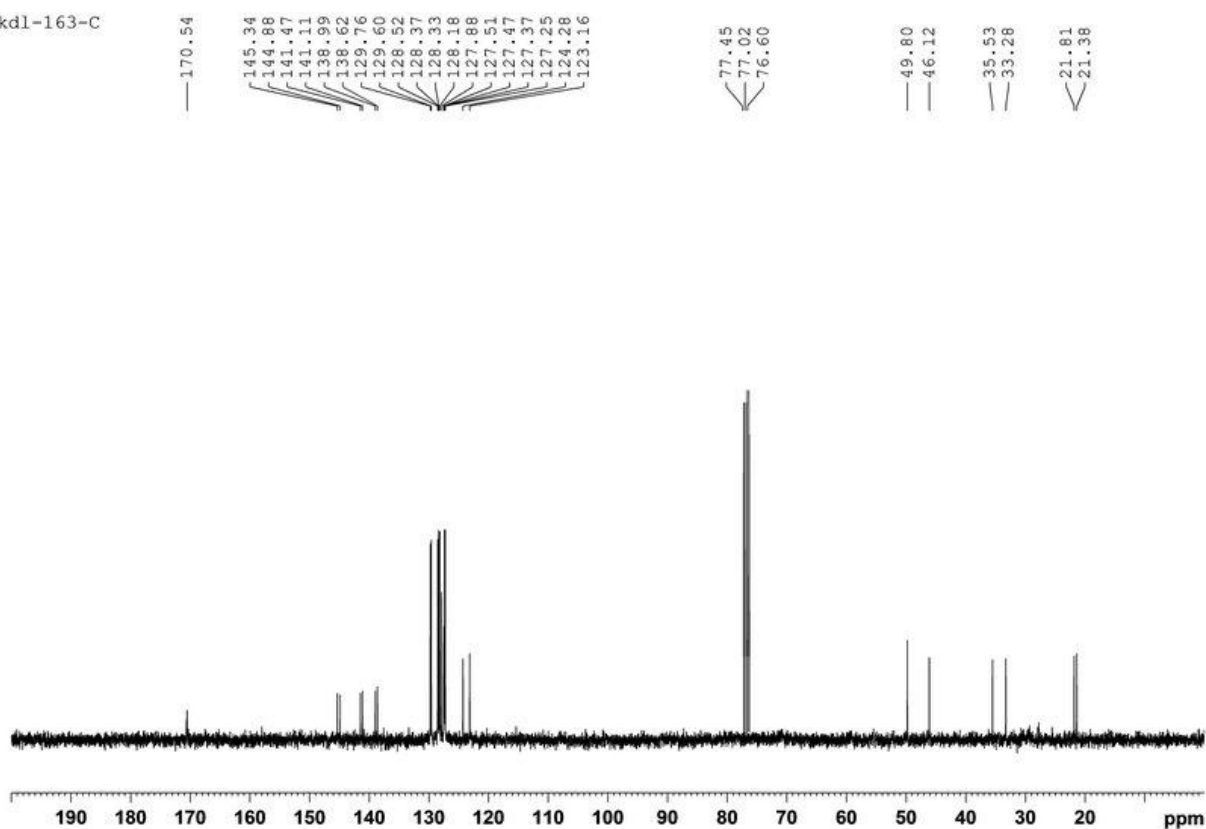

# 5ab

kdl-181-H

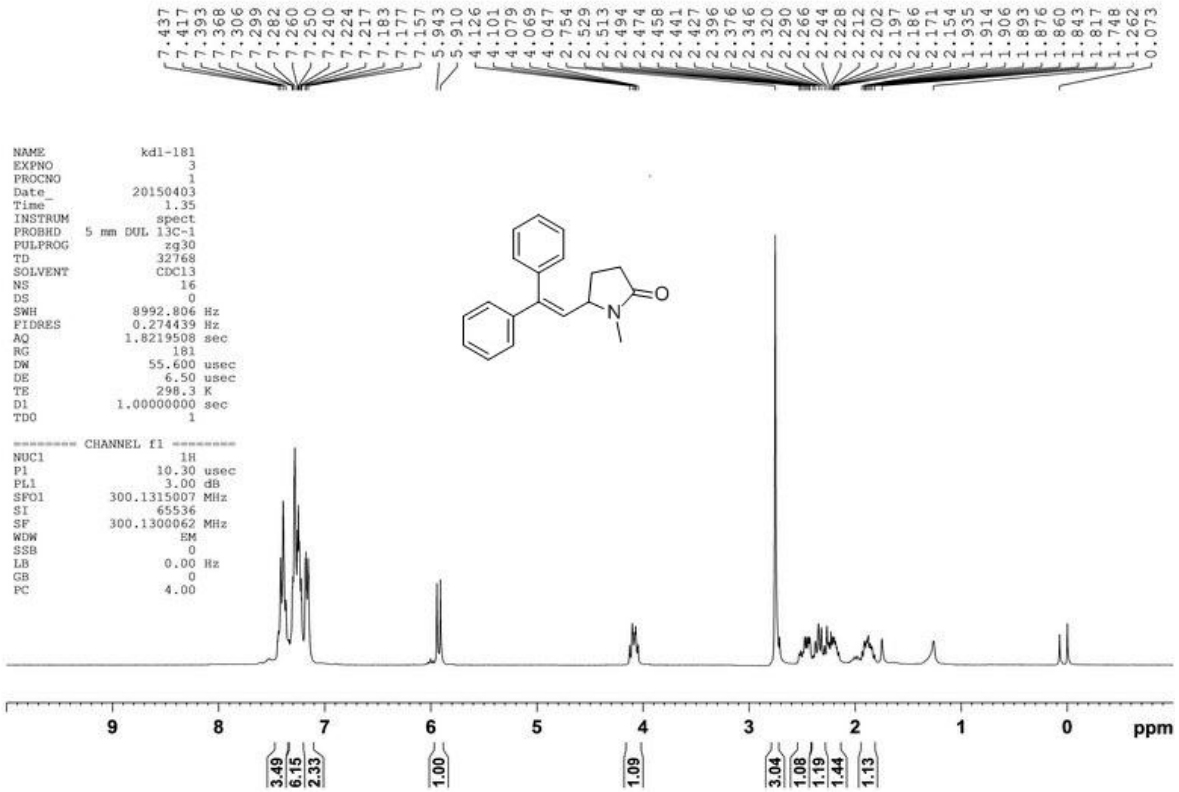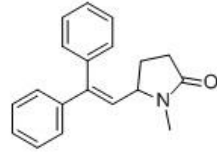

kdl-181-C

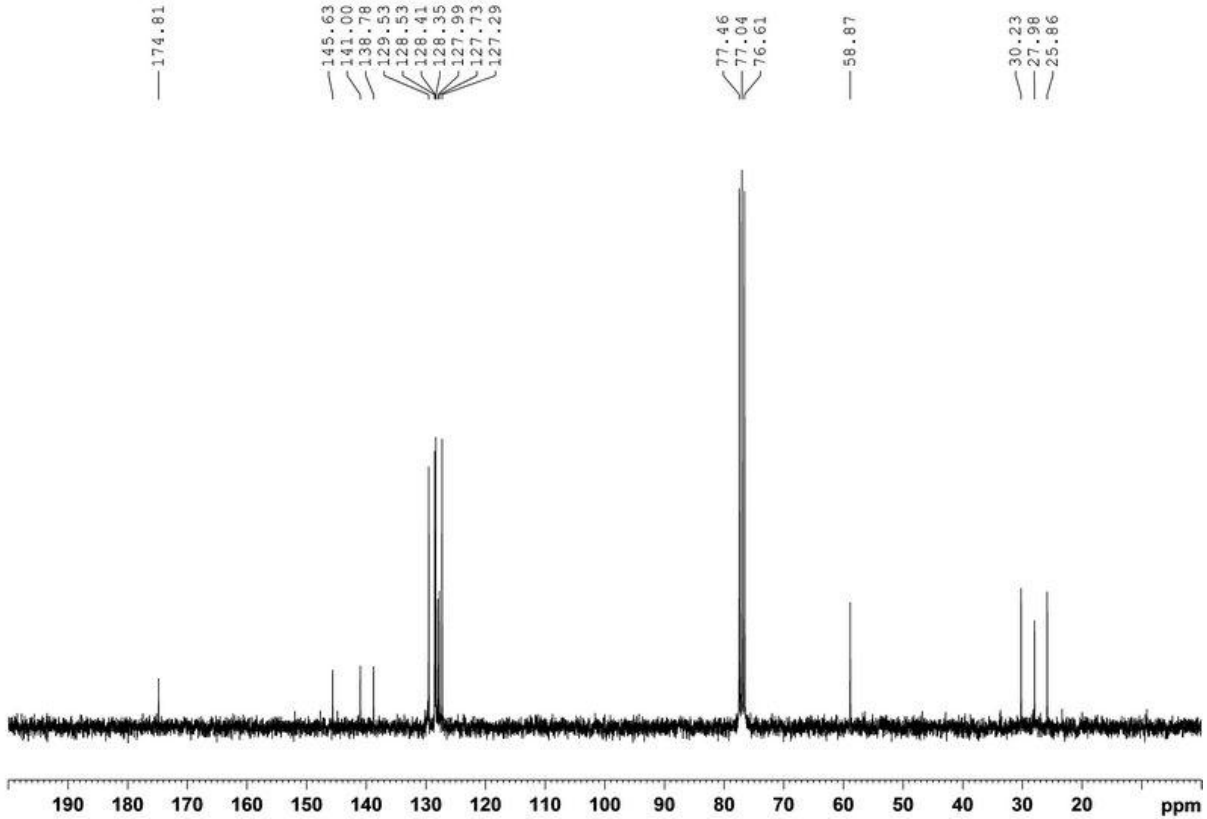

5c

kdl-217-DMA-H

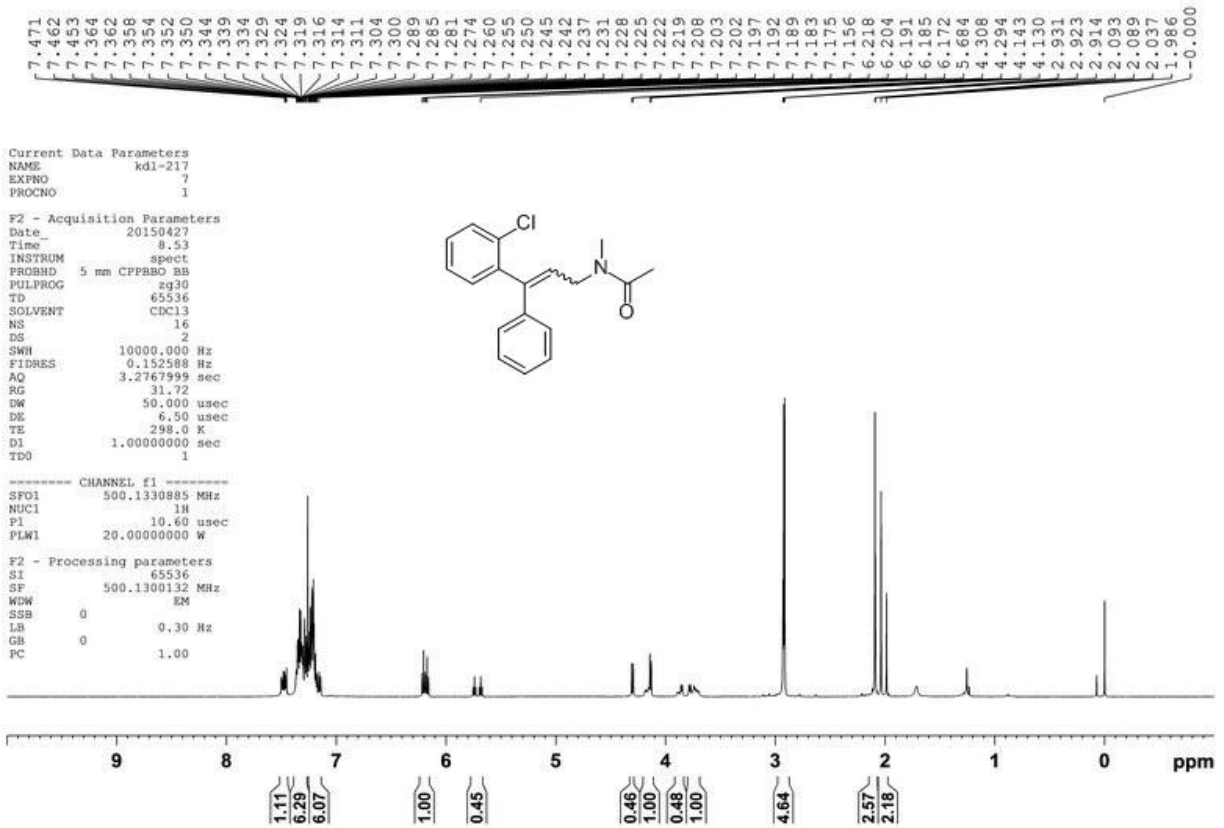

kdl-217-DMA-C

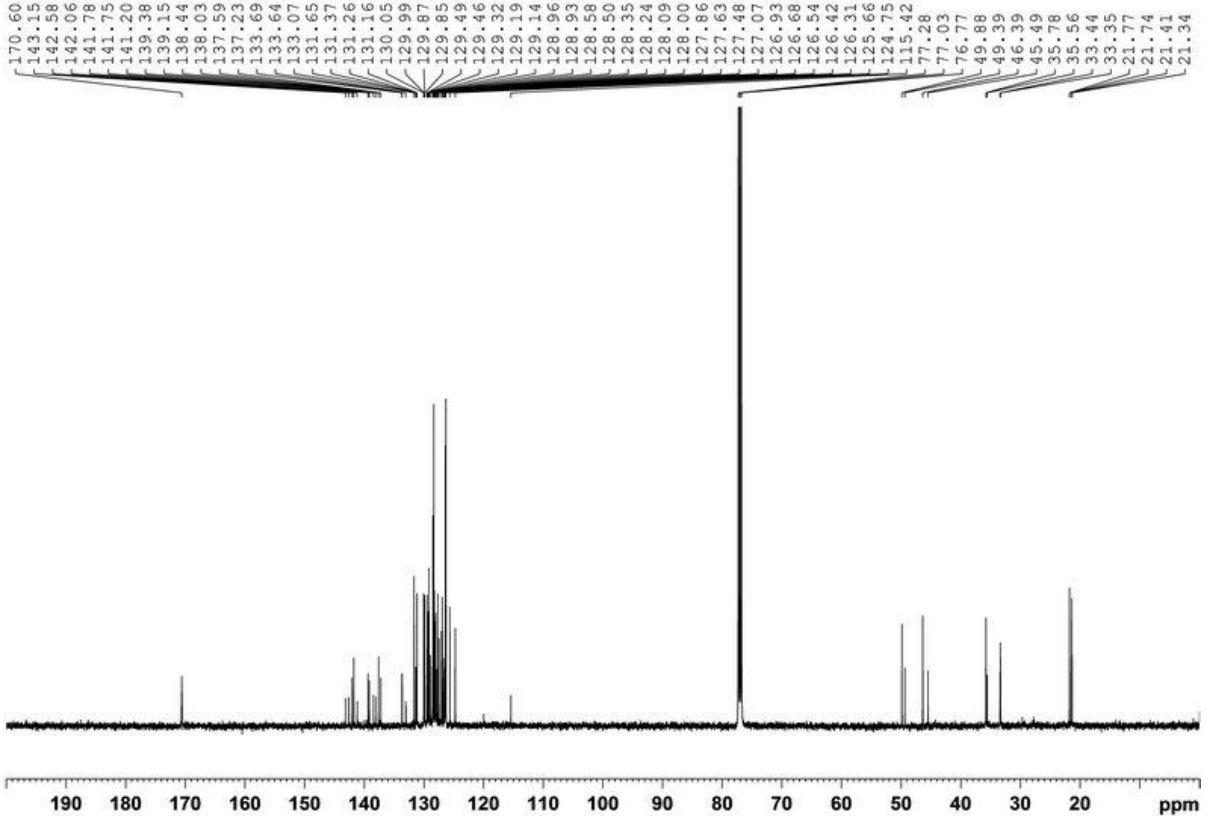

# 5d

kdl-212-DMA-H

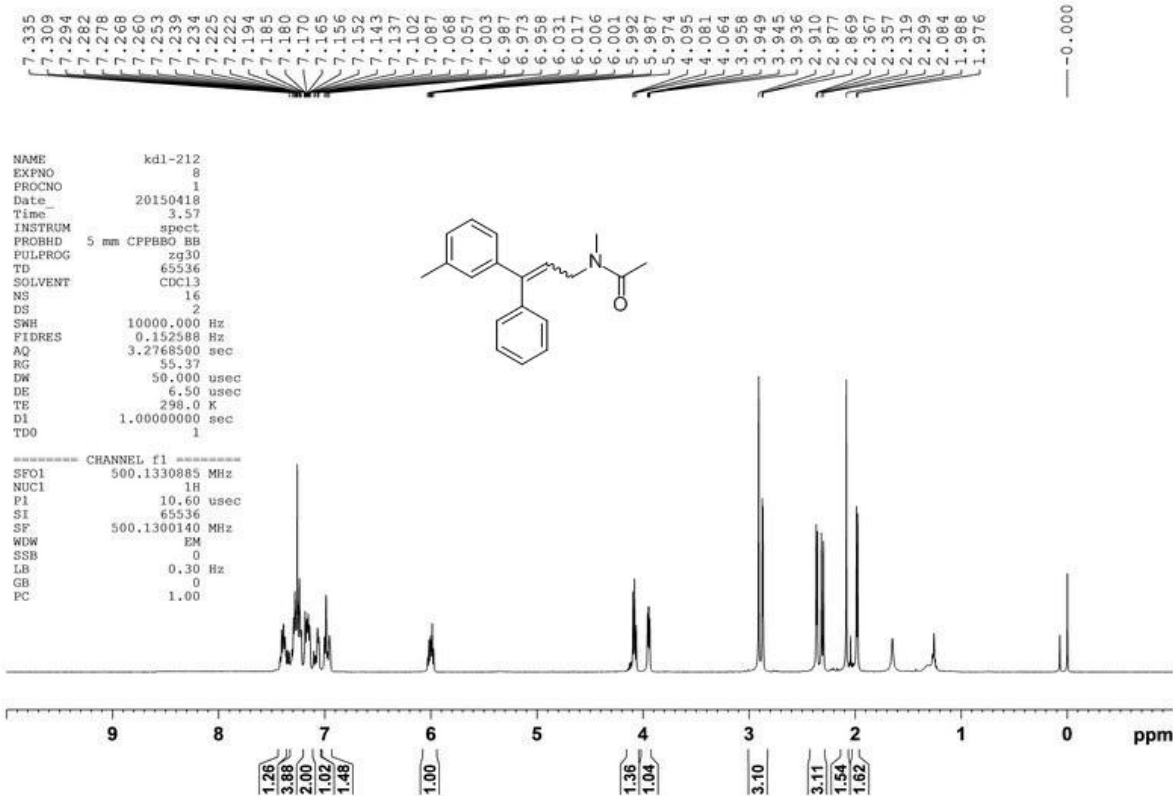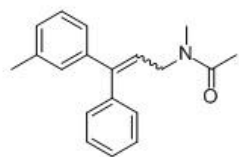

kdl-212-DMA-C

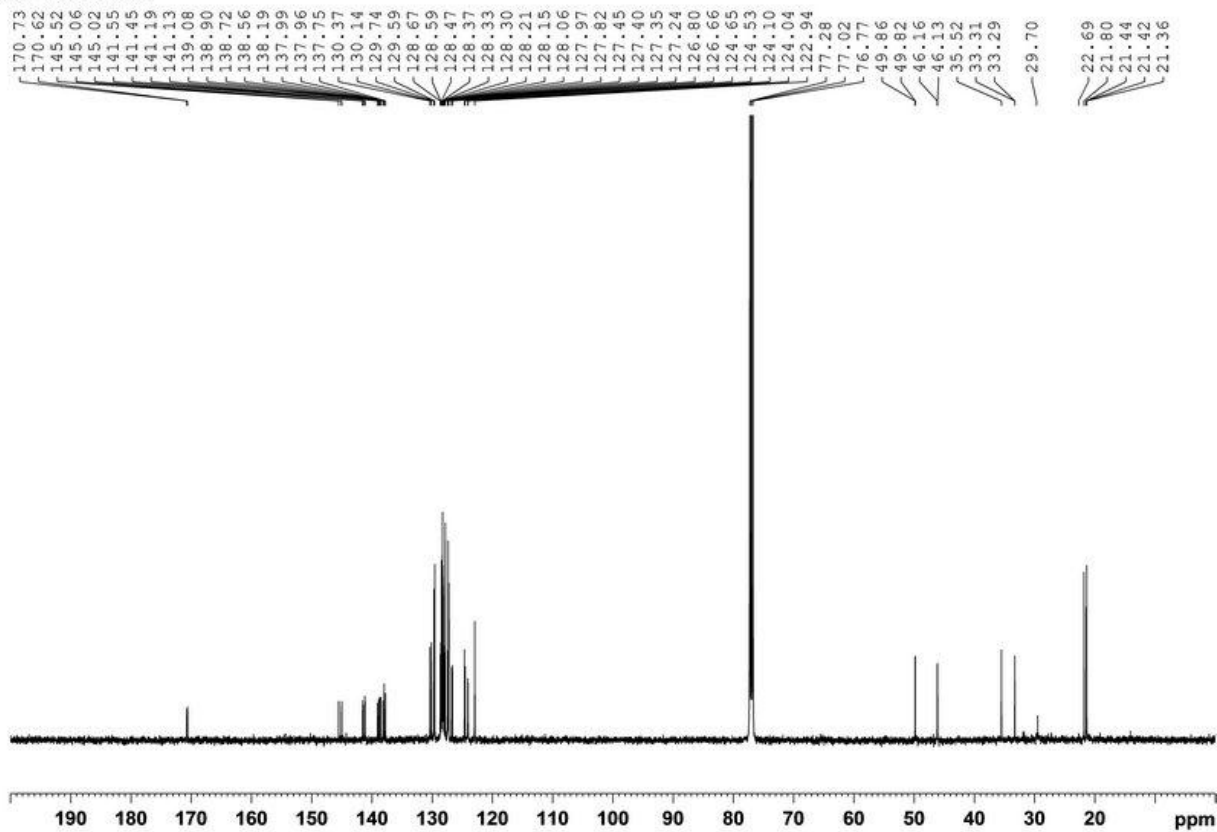



5e

kdl-178-H

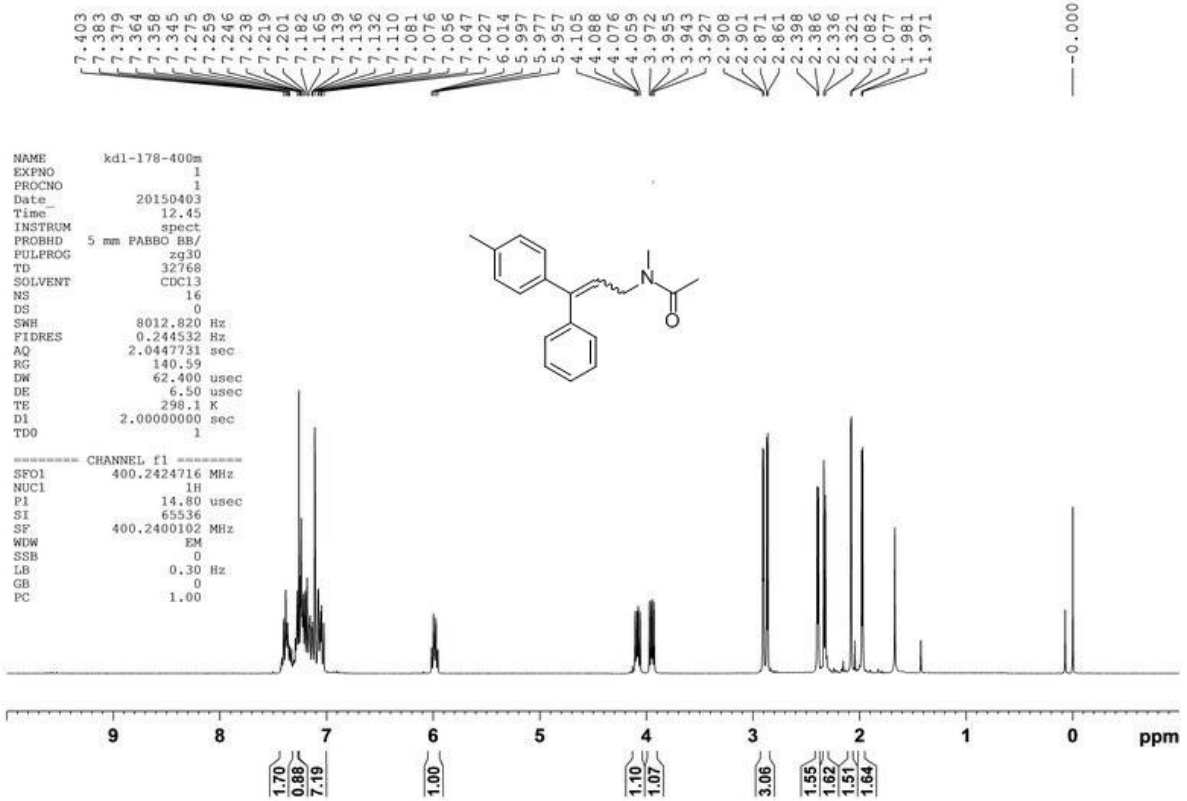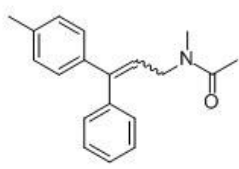

kdl-178-C

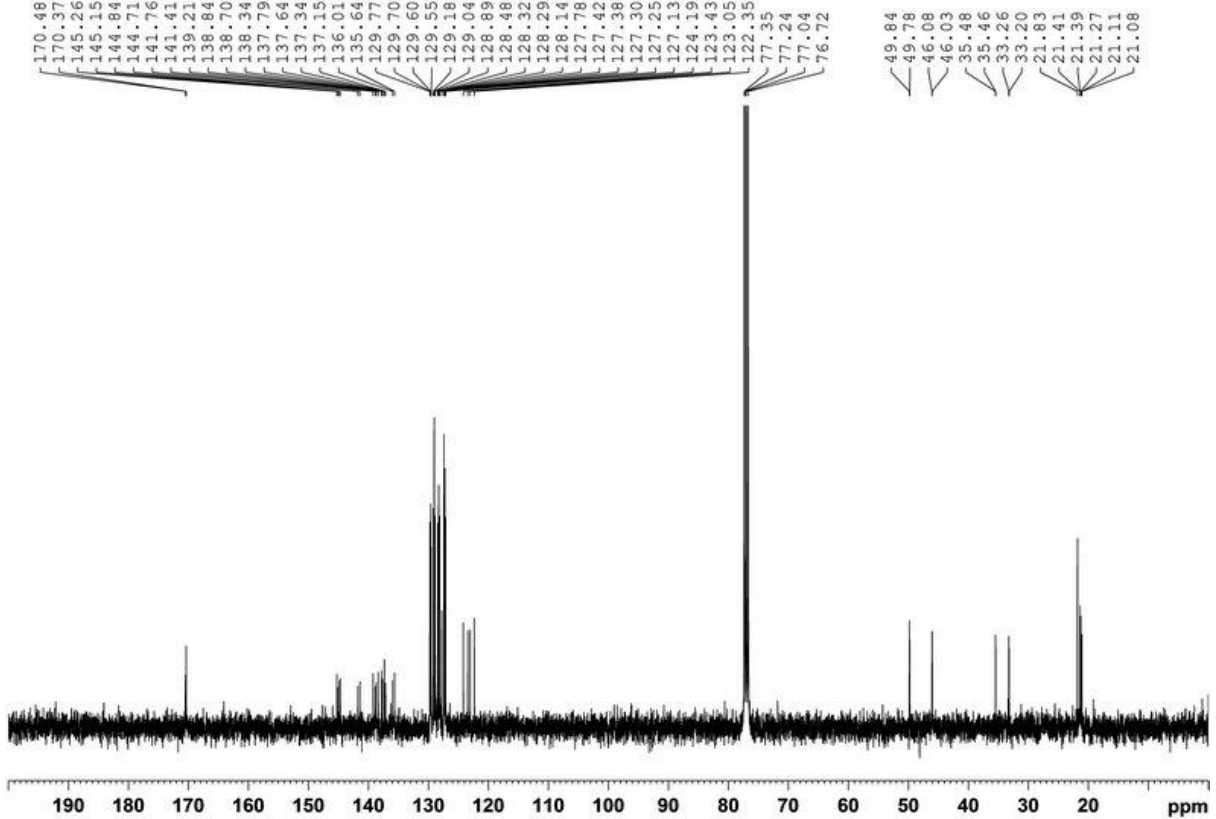

5f

kdl-245-H

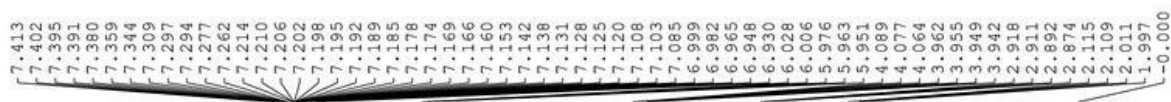

```

NAME          kdl-245
EXPNO         1
PROCNO        1
Date_         20150604
Time          17.11
INSTRUM       spect
PROBHD        5 mm CFPBBO BB
PULPROG       zg30
TD            65536
SOLVENT       CDCl3
NS            16
DS            2
SWH           10000.000 Hz
FIDRES        0.152588 Hz
AQ            3.2768500 sec
RG            31.72
DW            50.000 usec
DE            6.50 usec
TE            298.0 K
D1            1.00000000 sec
TD0           1

----- CHANNEL f1 -----
SFO1          500.1330885 MHz
NUC1          1H
P1            10.60 usec
SI            65536
SF            500.1300112 MHz
WDW           EM
SSB           0
LB            0.30 Hz
GB            0
PC            1.00
    
```

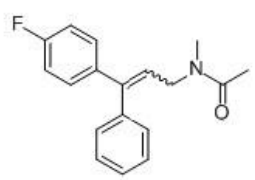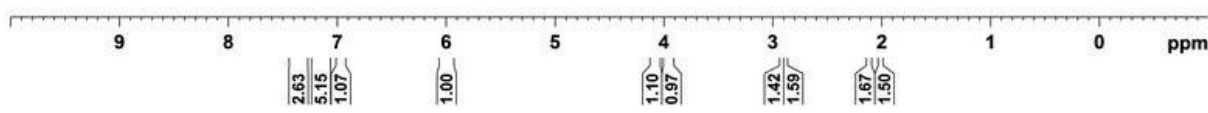

kdl-245-C

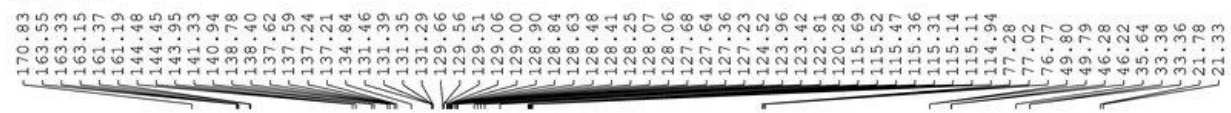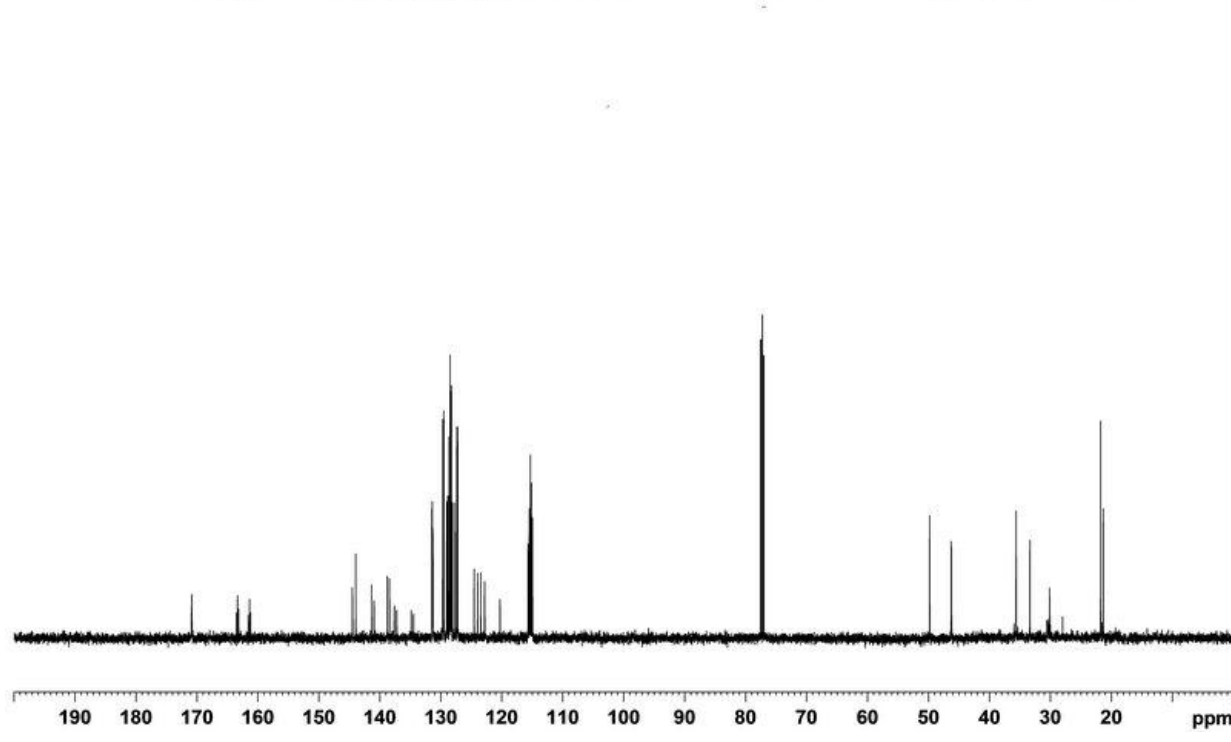

5g

kdl-192-H

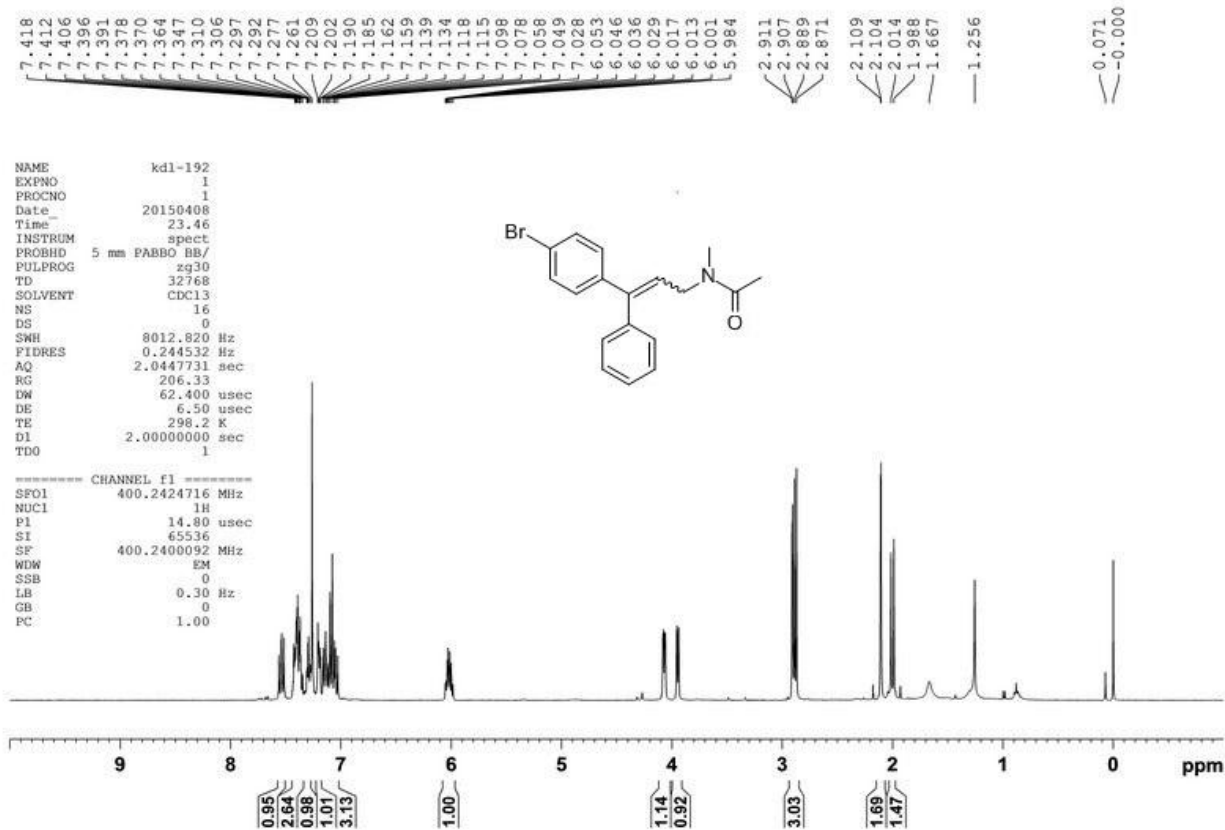

kdl-192-C

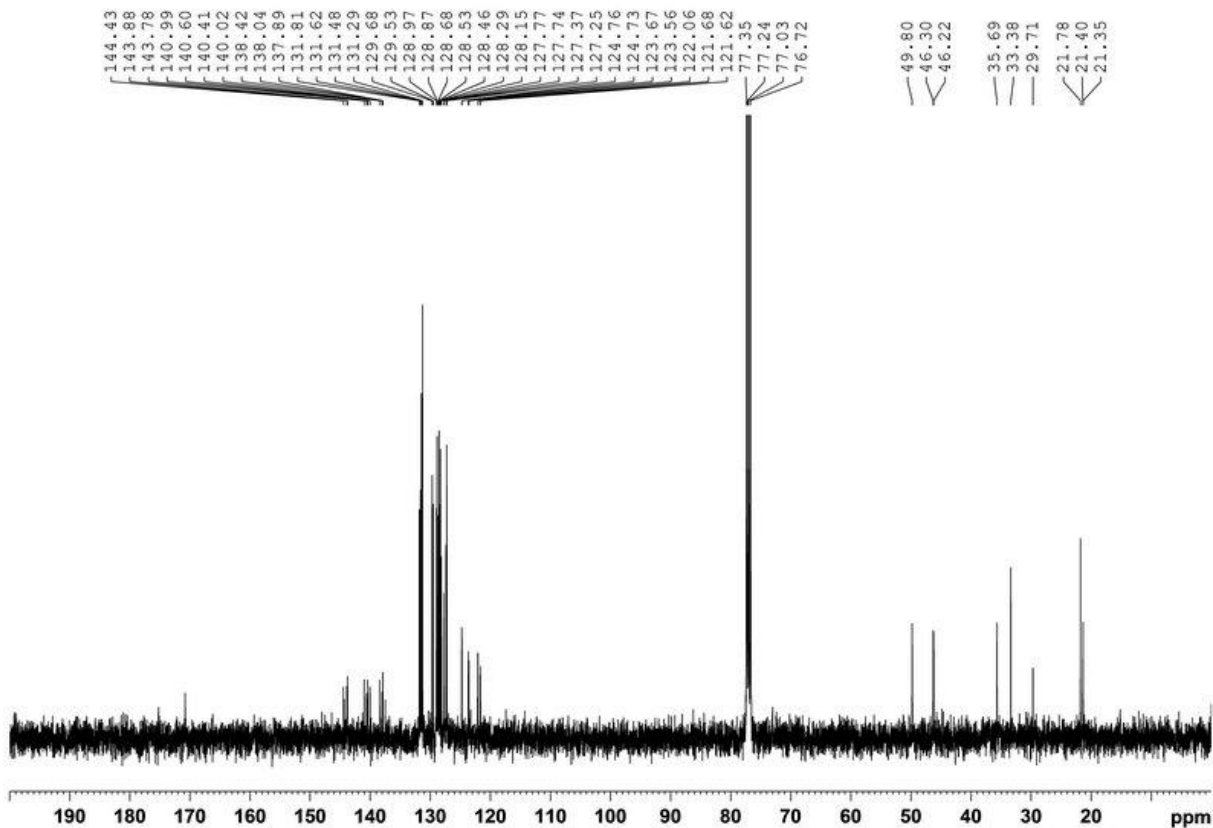

# 7aa

kdl-225

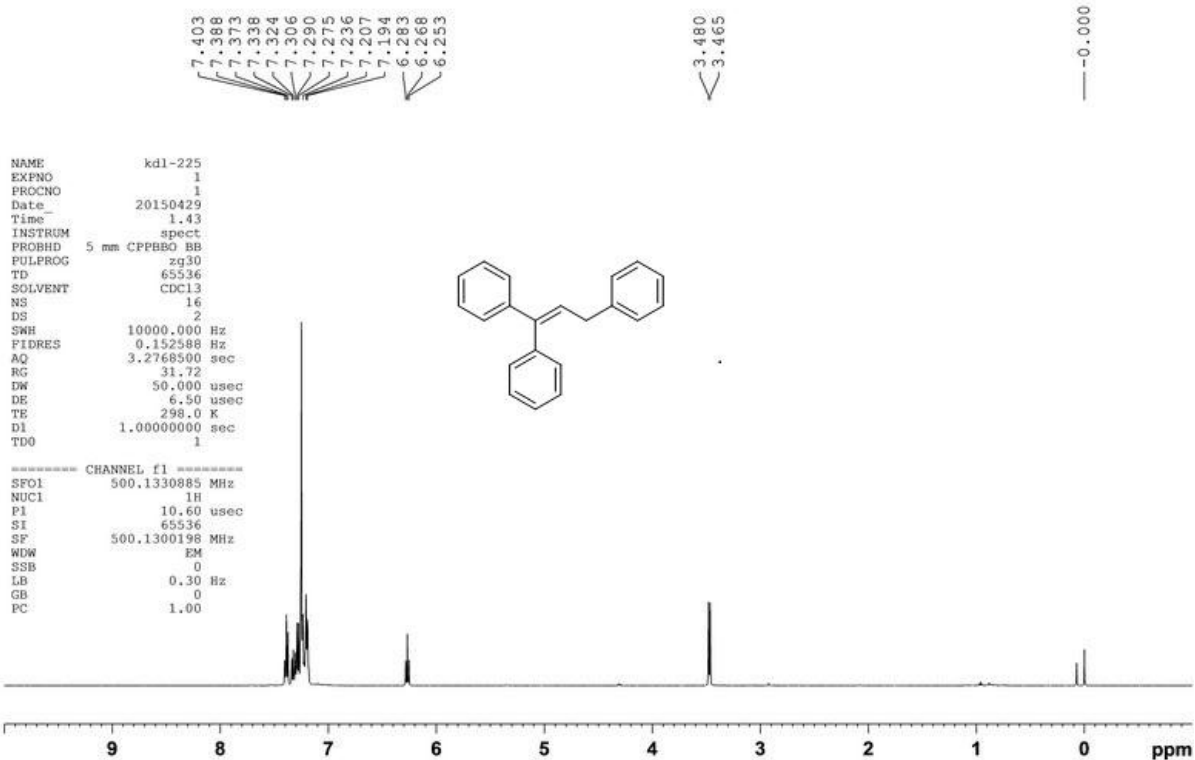

kdl-225-C

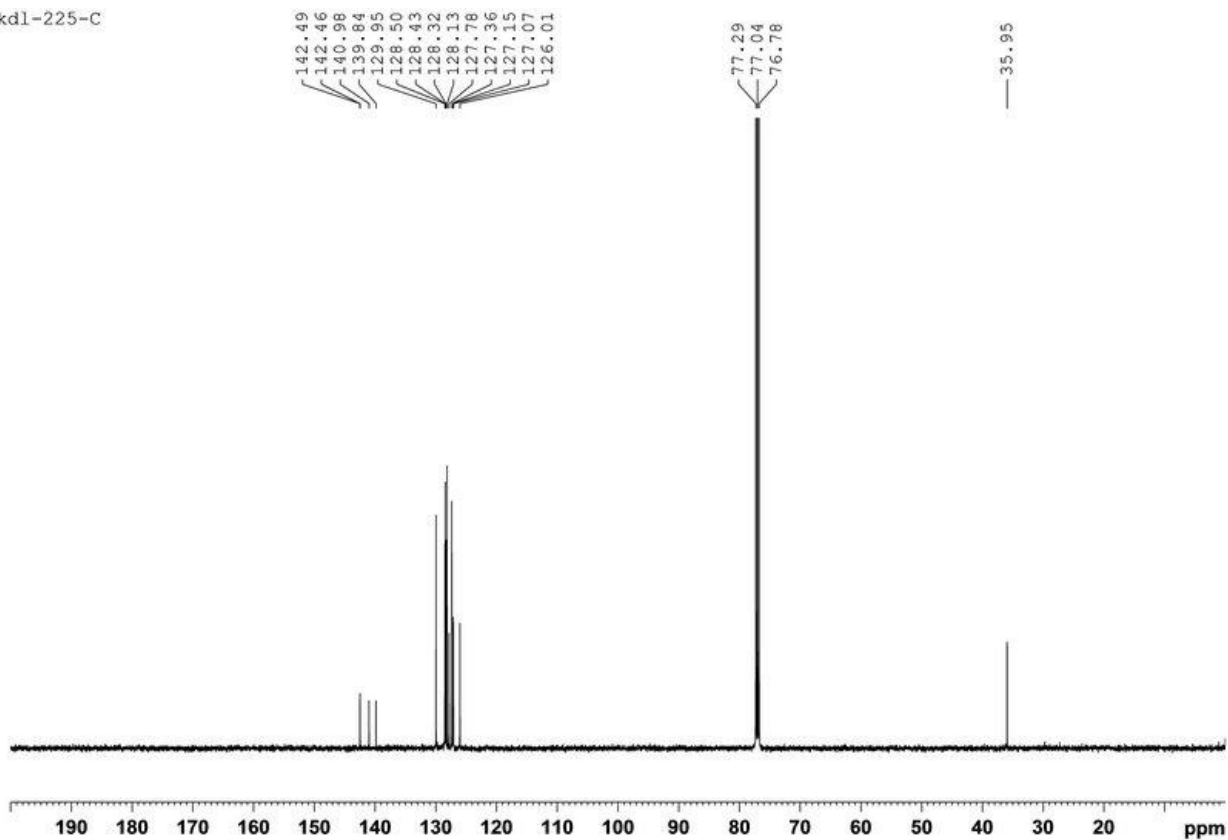

# 7ab

kdl-238-H

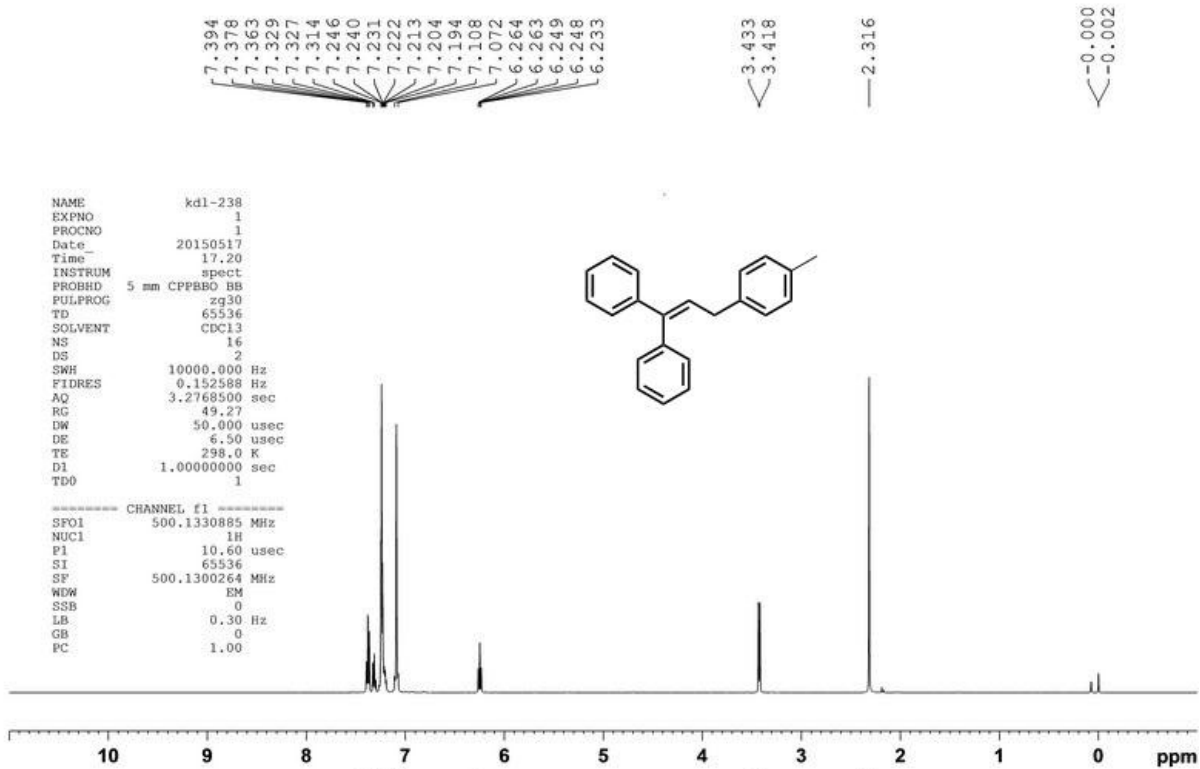

kdl-238-C

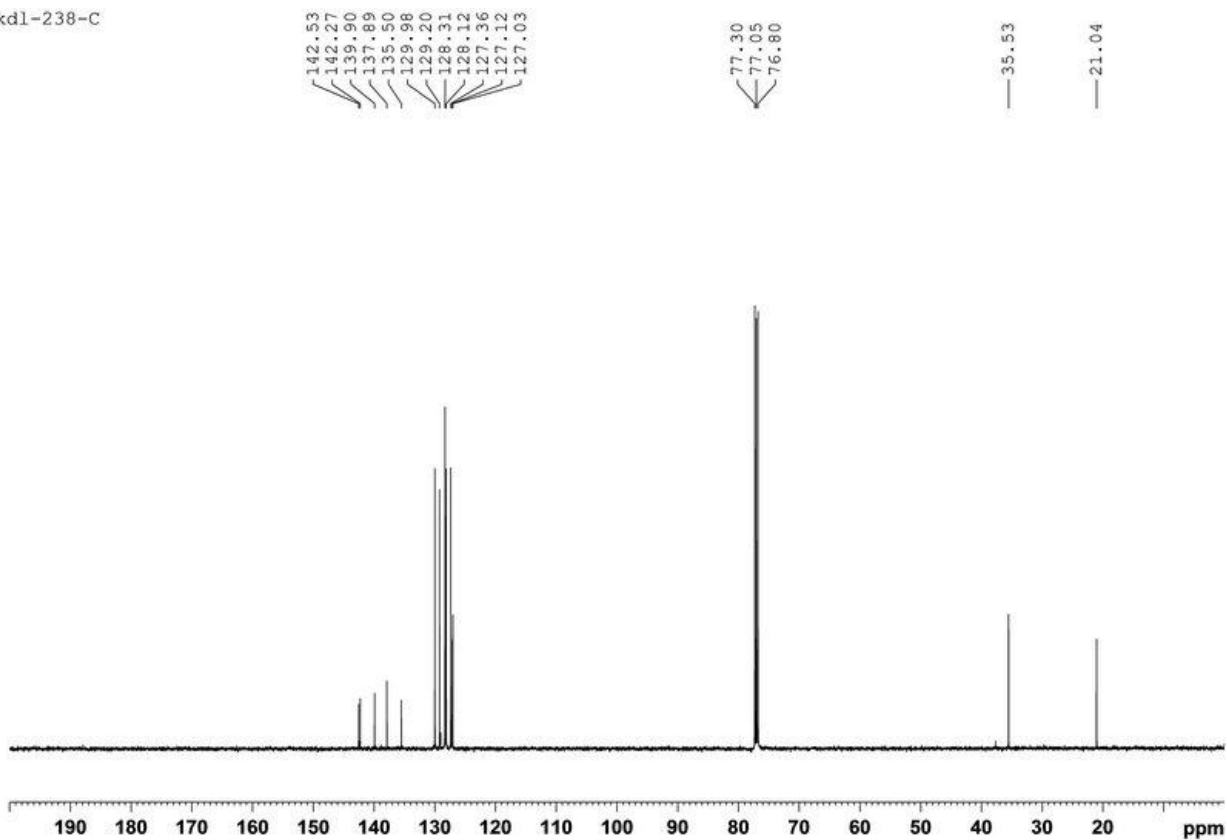

7ac

kdl-236-H

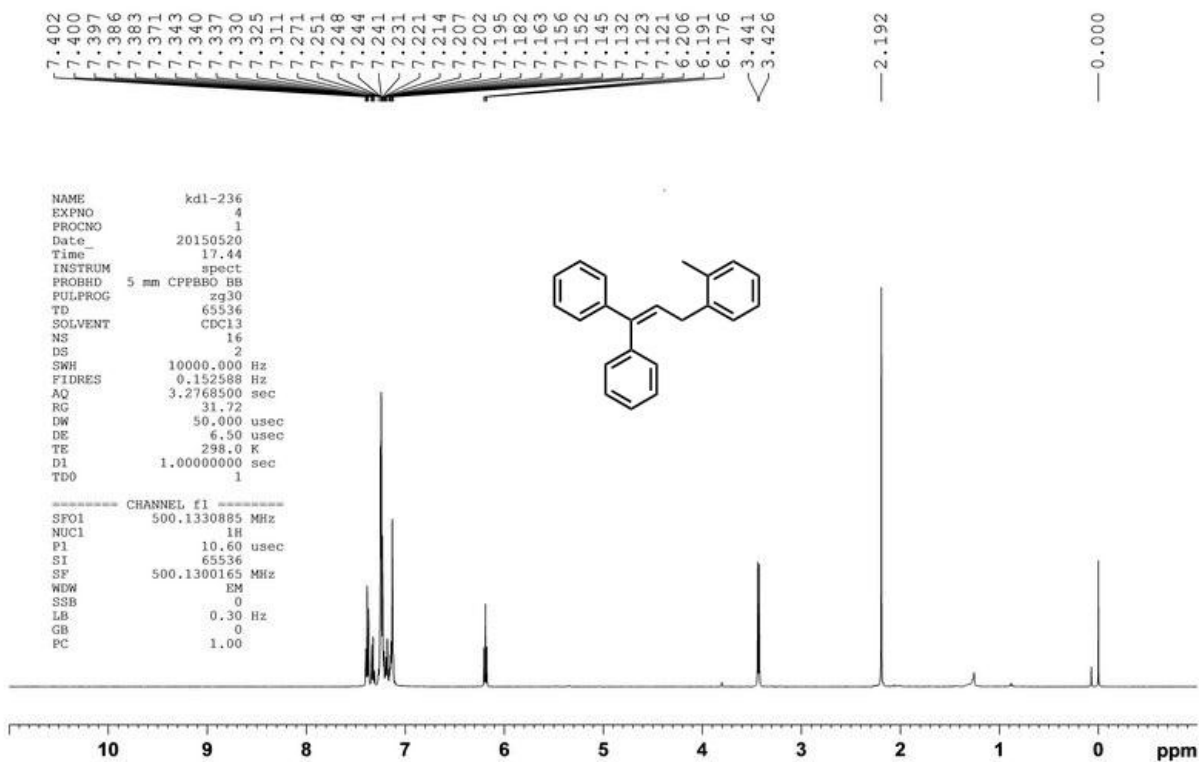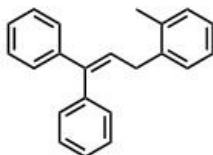

kdl-236-C

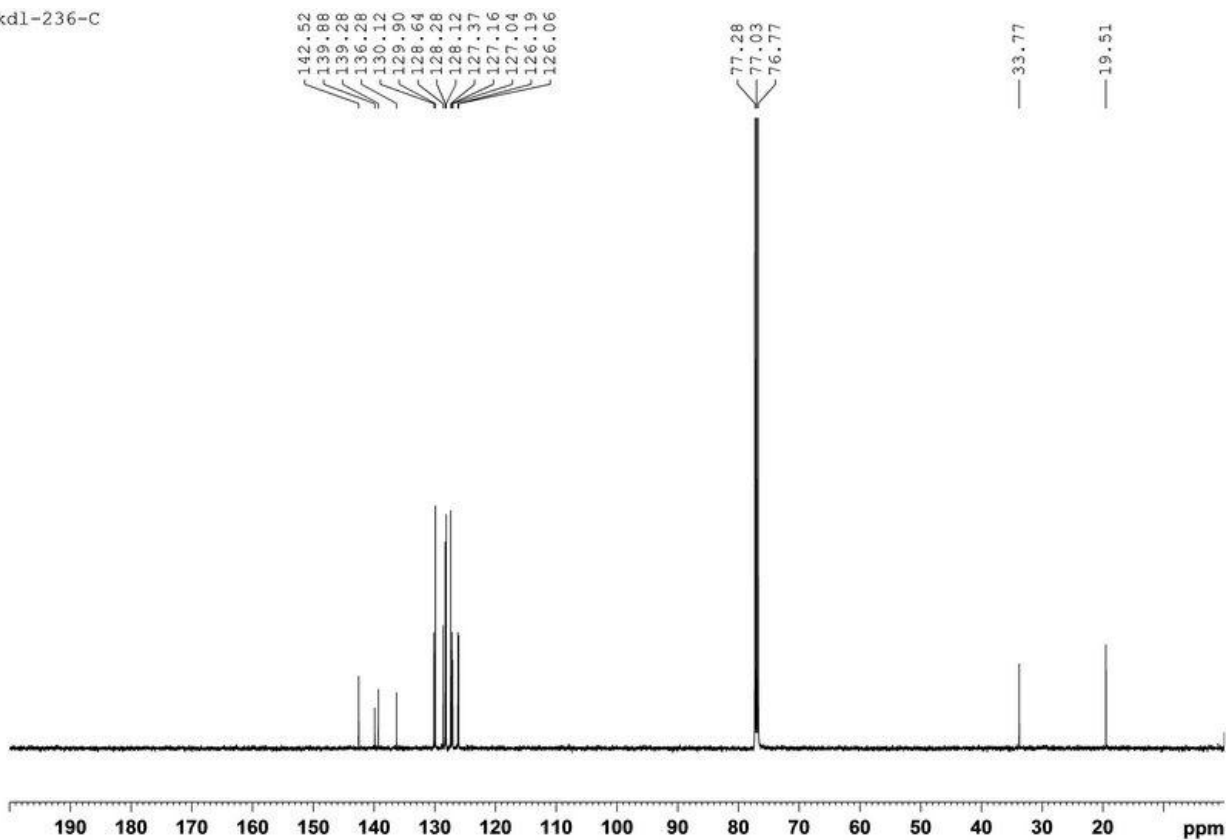

7ad

kdl-239-H

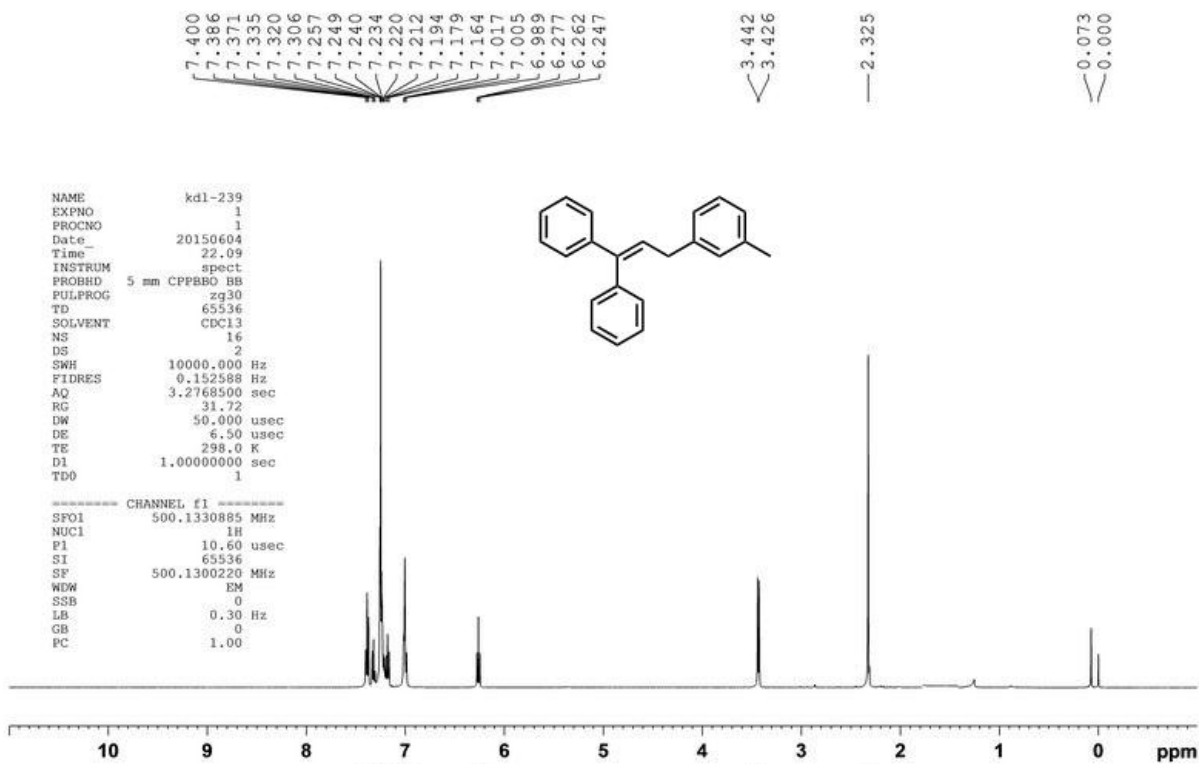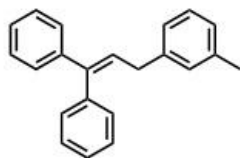

kdl-239-C

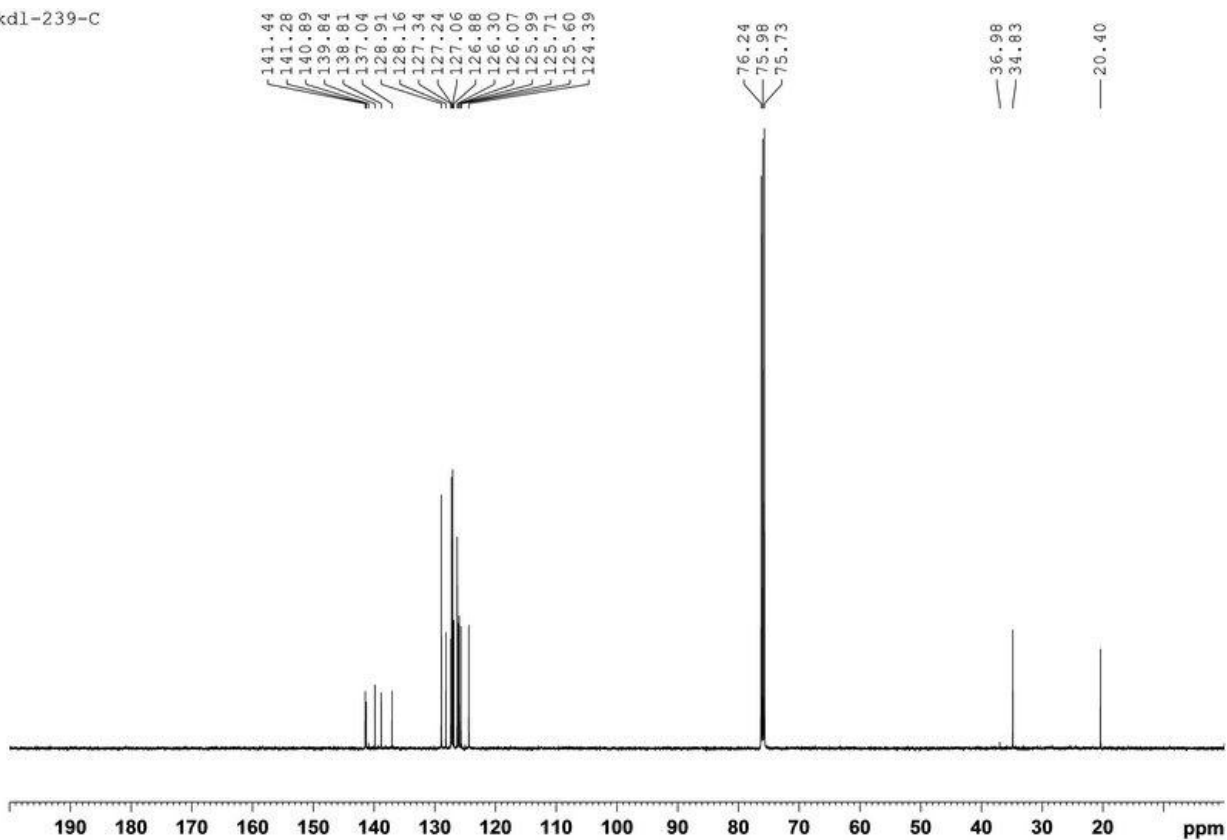

7ae

kdl-237-H

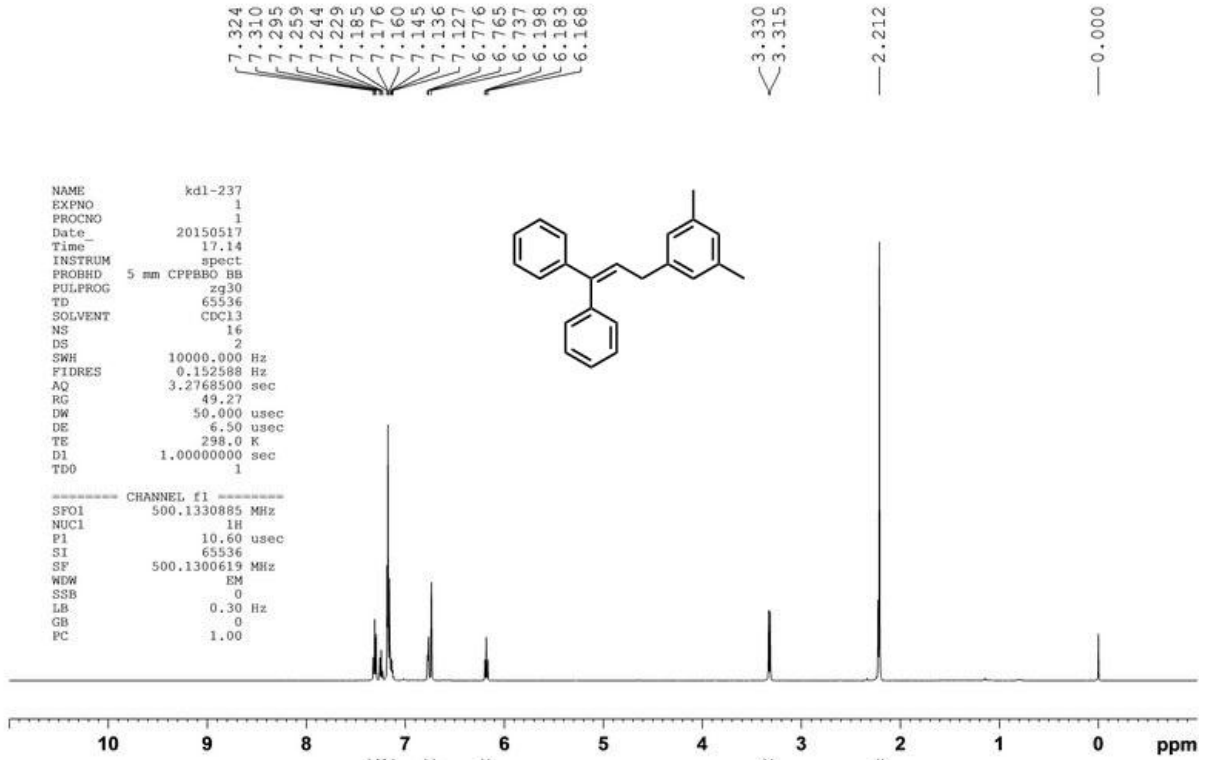

kdl-237-C

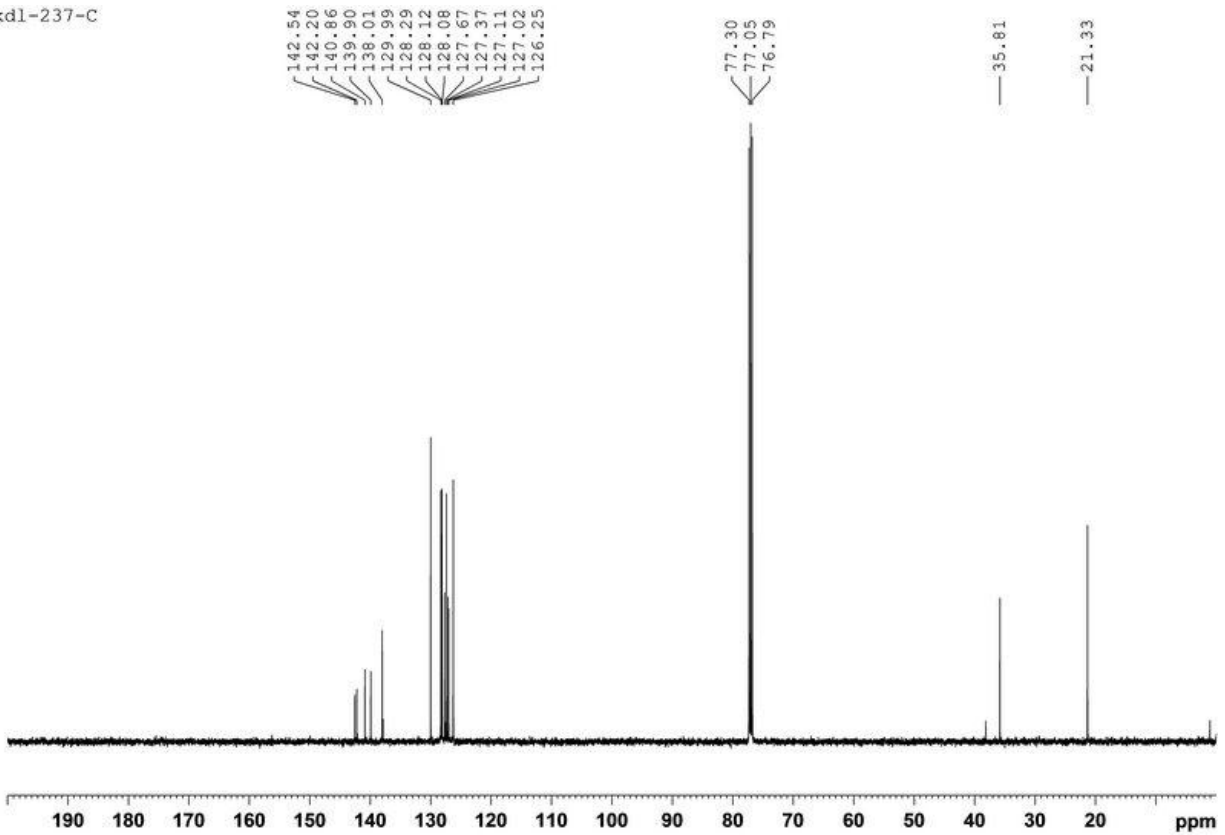



9aa

kdl-215-H

7.291  
7.276  
7.244  
7.233  
7.229  
7.224  
7.214  
7.191  
7.188  
7.181  
7.176  
7.167  
7.162  
7.153  
7.143  
7.136  
7.129  
7.127  
7.120  
7.113  
7.107  
5.909  
5.889  
2.456  
2.437  
1.732  
1.729  
1.721  
1.714  
1.711  
1.711  
1.706  
1.703  
1.699  
1.692  
1.683  
1.677  
1.625  
1.618  
1.613  
1.609  
1.598  
1.582  
1.459  
1.454  
1.445  
1.440  
1.430  
1.420  
1.352  
1.349  
1.335  
1.324  
1.318  
1.311  
1.306  
1.294  
-0.000

NAME kdl-215  
EXPNO 1  
PROCNO 1  
Date 20150423  
Time 1.25  
INSTRUM spect  
PROBHD 5 mm CPPBBO BB  
PULPROG zg30  
TD 65536  
SOLVENT CDCl3  
NS 16  
DS 2  
SWH 10000.000 Hz  
FIDRES 0.152588 Hz  
AQ 3.2768500 sec  
RG 31.72  
DW 50.000 usec  
DE 6.30 usec  
TE 298.0 K  
D1 1.00000000 sec  
TD0 1

----- CHANNEL f1 -----  
SFO1 500.1330885 MHz  
NUC1 1H  
P1 10.60 usec  
SI 65536  
SF 500.1300530 MHz  
WDW EM  
SSB 0  
LB 0.30 Hz  
GB 0  
PC 1.00

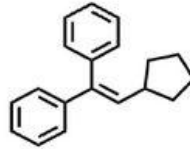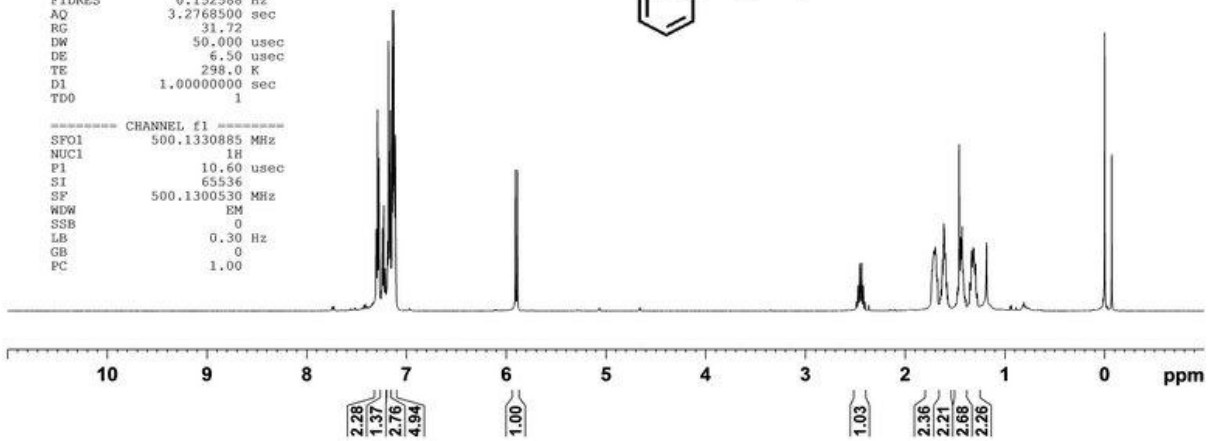

kdl-215-C

143.85  
141.85  
139.56  
138.90  
134.43  
131.39  
128.98  
128.57  
127.65  
127.25  
127.03  
127.01  
126.88  
126.82  
126.59  
126.20  
125.73  
125.65  
76.24  
75.98  
75.73  
39.38  
33.19  
28.68  
24.57  
13.10

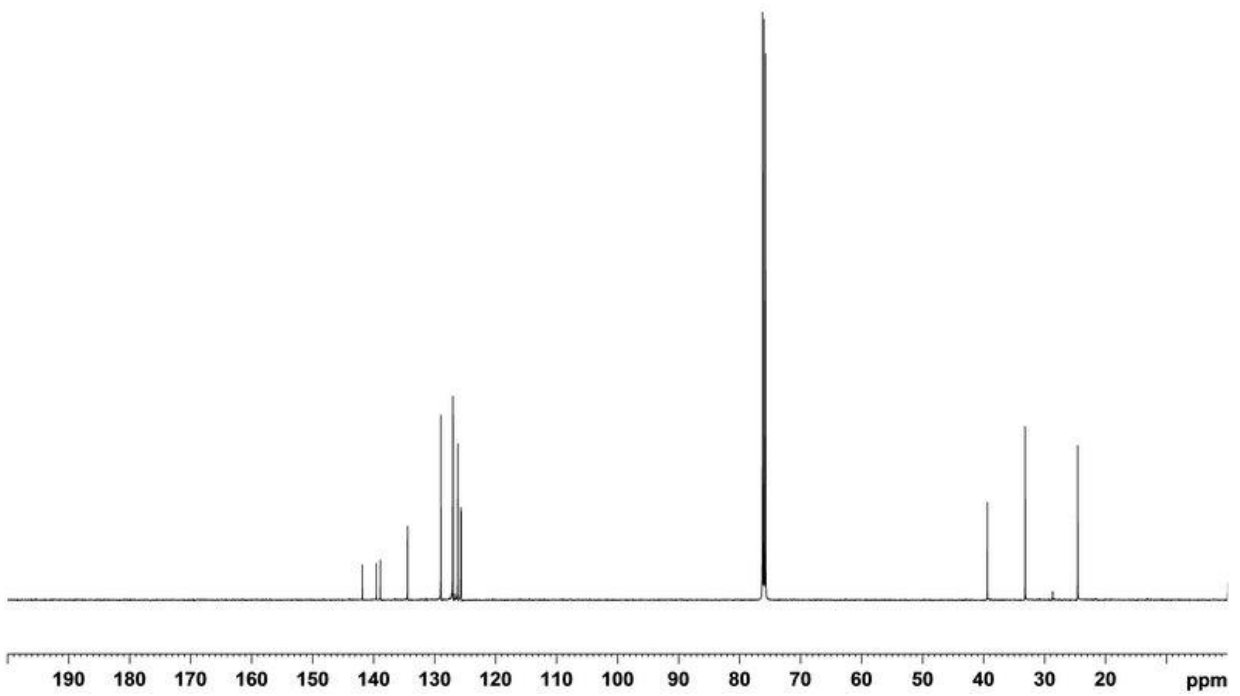

9ab

kd1-5aa

7.421  
7.414  
7.392  
7.368  
7.357  
7.351  
7.346  
7.328  
7.295  
7.281  
7.267  
7.248  
7.236  
7.221  
7.214  
7.209  
7.188  
5.941  
5.908

2.154  
2.132  
1.705  
1.689  
1.617  
1.558  
1.280  
1.200  
1.175  
0.096  
0.026

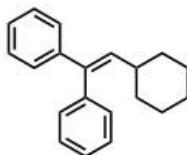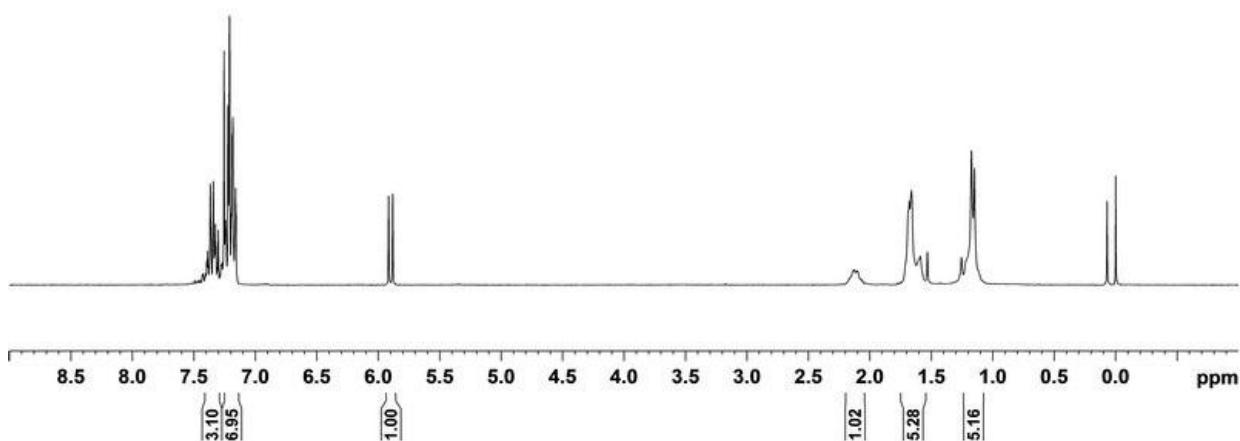

kd1-5aa-c

142.93  
140.57  
139.56  
135.99  
129.79  
128.12  
128.03  
127.19  
126.76  
126.70

77.44  
77.02  
76.59

38.30  
33.33  
25.99  
25.59

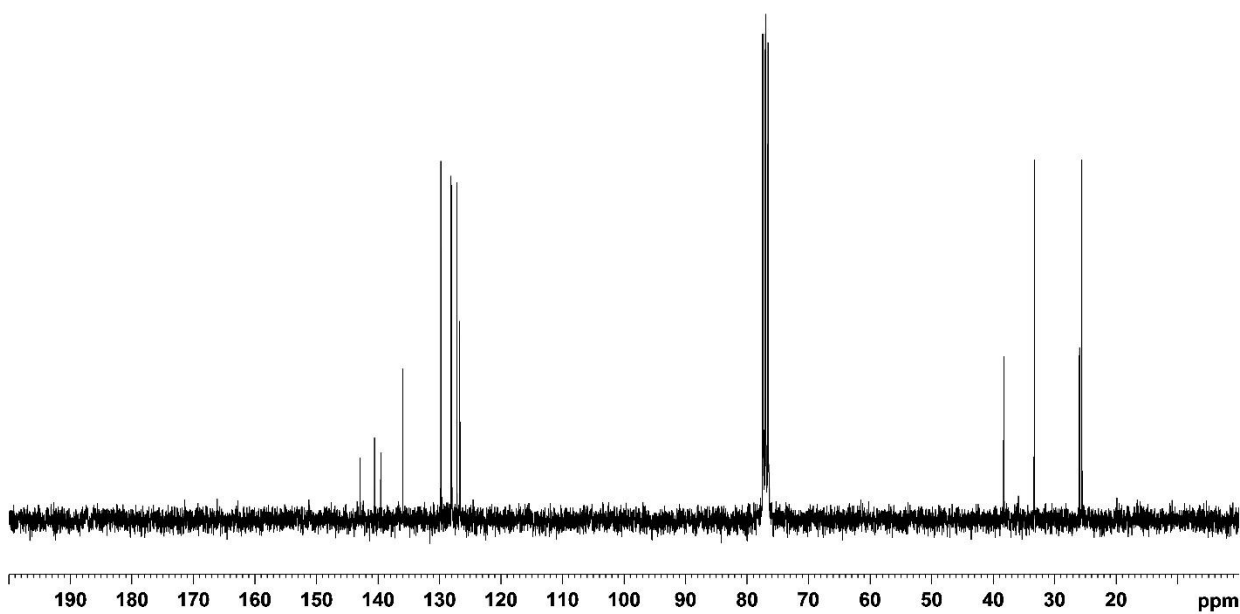

# 9ac

kdl-240-h

7.379  
7.373  
7.362  
7.358  
7.343  
7.319  
7.315  
7.312  
7.303  
7.297  
7.278  
7.261  
7.253  
7.244  
7.240  
7.233  
7.226  
7.210  
7.205  
7.197  
7.192  
7.188  
7.185  
7.178  
7.174  
7.169  
7.157  
6.020  
5.994  
1.749  
1.738  
1.731  
1.720  
1.712  
1.703  
1.693  
1.670  
1.653  
1.642  
1.635  
1.624  
1.618  
1.537  
1.529  
1.511  
1.506  
1.495  
1.467  
1.460  
1.441  
1.436  
1.415  
1.408  
1.386  
1.357  
1.349  
0.000

NAME kdl-240  
EXPNO 1  
PROCNO 1  
Date\_ 20150521  
Time 1.06  
INSTRUM spect  
PROBHD 5 mm PABBO BB/  
PULPROG zg30  
TD 32768  
SOLVENT CDCl3  
NS 16  
DS 0  
SWH 8012.820 Hz  
FIDRES 0.244532 Hz  
AQ 2.0447731 sec  
RG 206.33  
BW 62.400 usec  
DE 6.50 usec  
TE 298.0 K  
D1 2.00000000 sec  
TD0 1

----- CHANNEL f1 -----  
SFO1 400.2424716 MHz  
NUC1 1H  
P1 14.80 usec  
SI 65536  
SF 400.2400125 MHz  
WDW EM  
SSB 0  
LB 0.30 Hz  
GB 0  
PC 1.00

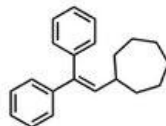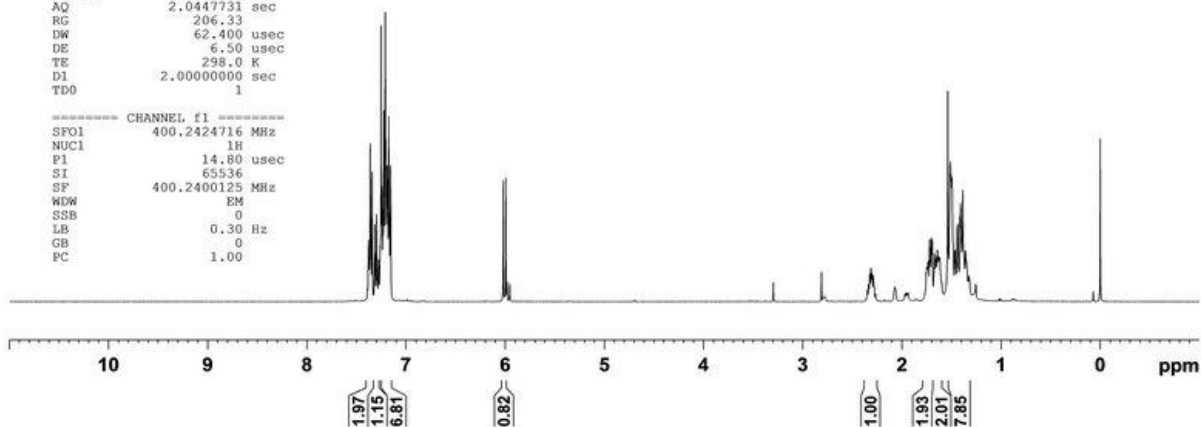

kdl-240-h

143.01  
140.58  
138.11  
136.61  
129.84  
128.10  
128.03  
127.22  
126.73  
126.65

77.34  
77.02  
76.71

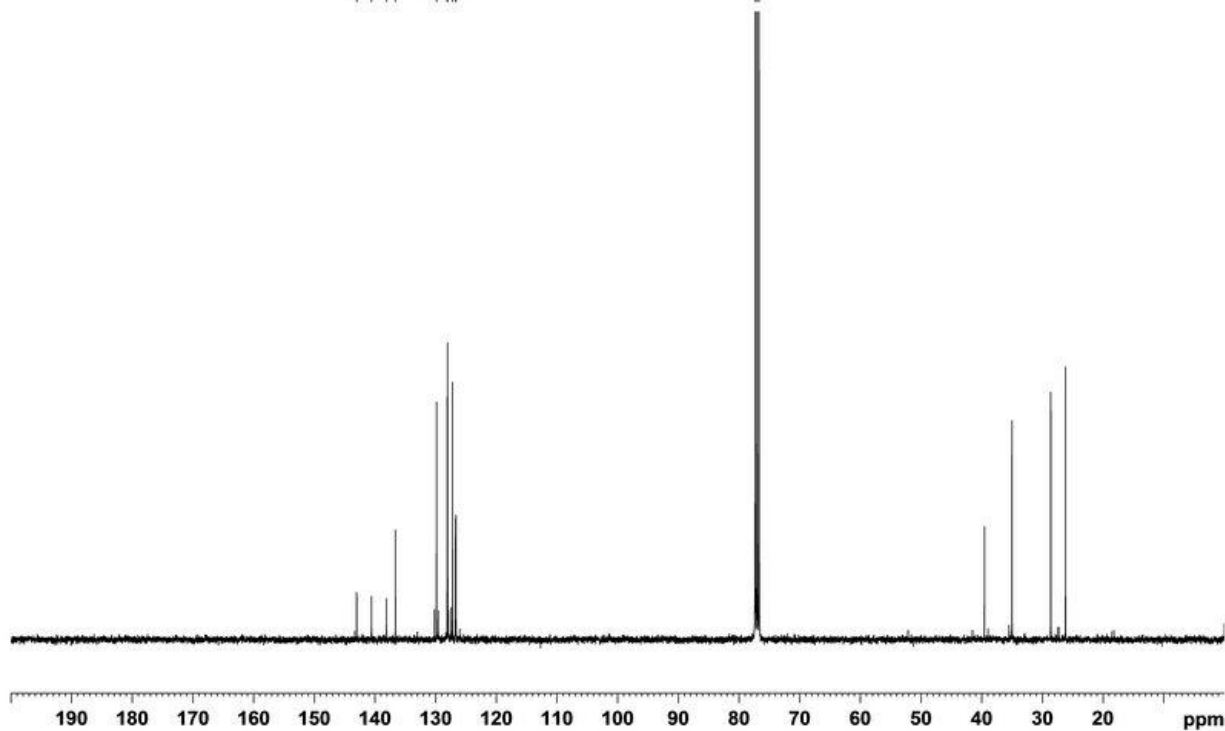

9bb

kdl-167-H

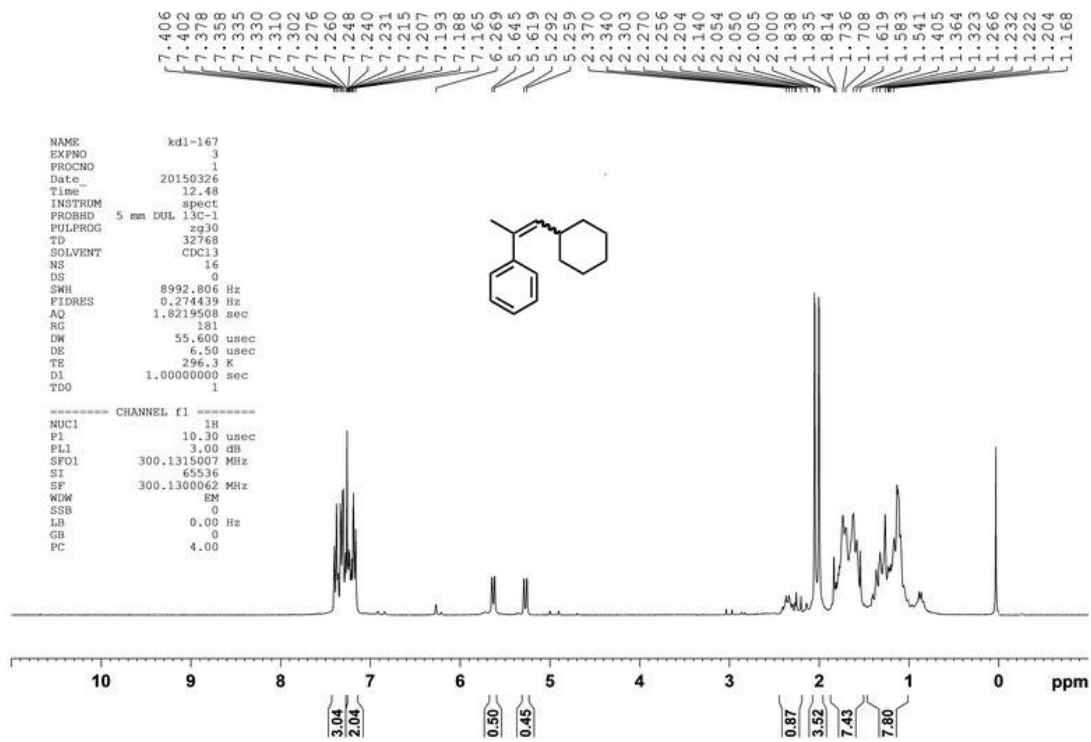

NAME kdl-167  
 EXPNO 3  
 PROCNO 1  
 Date\_ 20150326  
 Time 12.48  
 INSTRUM spect  
 PROBRD 5 mm DUL 13C-1  
 PULPROG zg30  
 TD 32768  
 SOLVENT CDCl3  
 NS 16  
 DS 0  
 SWH 8992.806 Hz  
 FIDRES 0.274439 Hz  
 AQ 1.8219508 sec  
 RG 181  
 DW 55.600 usec  
 DE 6.50 usec  
 TE 296.3 K  
 D1 1.00000000 sec  
 TD0 1

----- CHANNEL f1 -----  
 NUC1 1H  
 P1 10.30 usec  
 PL1 3.00 dB  
 SFO1 300.1315007 MHz  
 SI 65336  
 SF 300.1300062 MHz  
 WDW EM  
 SSB 0  
 LB 0.00 Hz  
 GB 0  
 PC 4.00

kdl-167-C

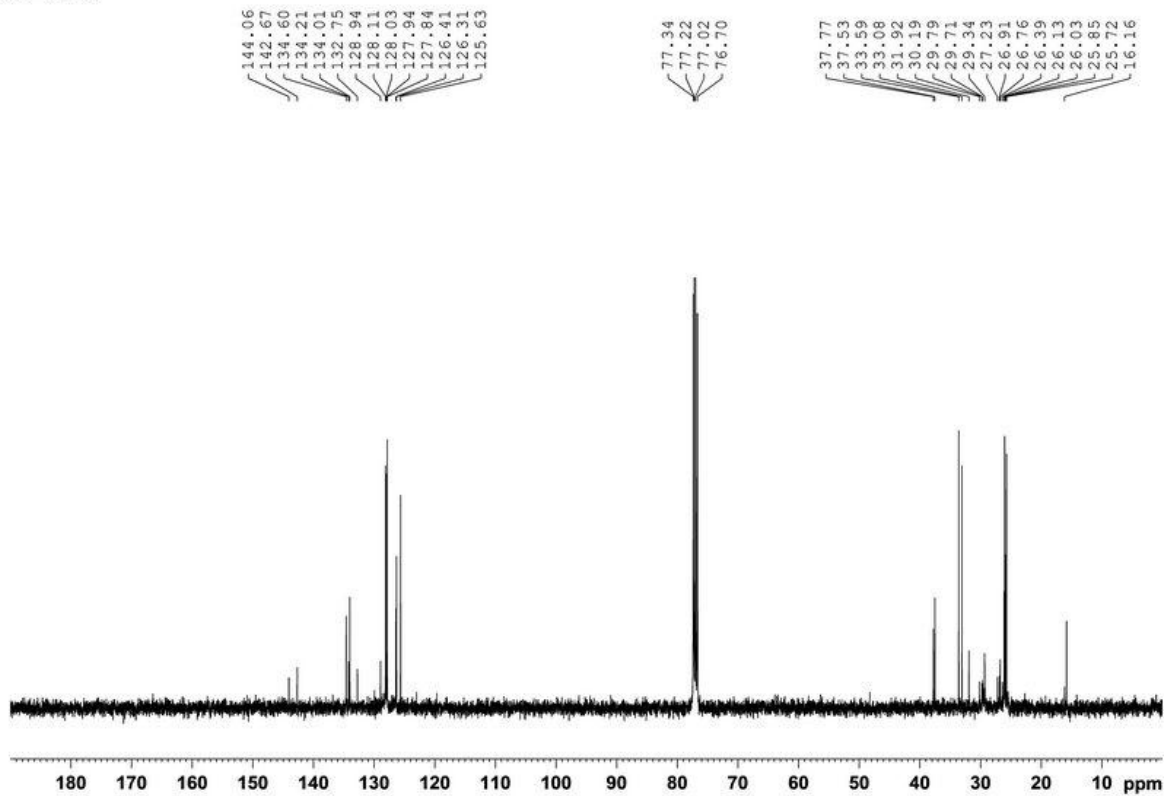

# 10a

kdl-210

7.336  
7.325  
7.316  
7.269  
7.265  
7.246  
7.218  
7.207  
7.196

6.239

0.883  
0.857  
0.830  
0.374  
0.348  
-0.000

```
Current Data Parameters
NAME      kdl-TES-210
EXPNO     1
PROCNO    1

F2 - Acquisition Parameters
Date_     20151011
Time      13.03
INSTRUM   spect
PROBHD    5 mm DUL 13C-1
PULPROG   zg30
TD         65536
SOLVENT   CDCl3
NS         16
DS         2
SWH        6009.615 Hz
FIDRES     0.091699 Hz
AQ         5.4522912 sec
RG         196.23
DM         83.200 usec
DE         6.50 usec
TE         298.2 K
D1         1.00000000 sec
TDO        1
```

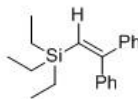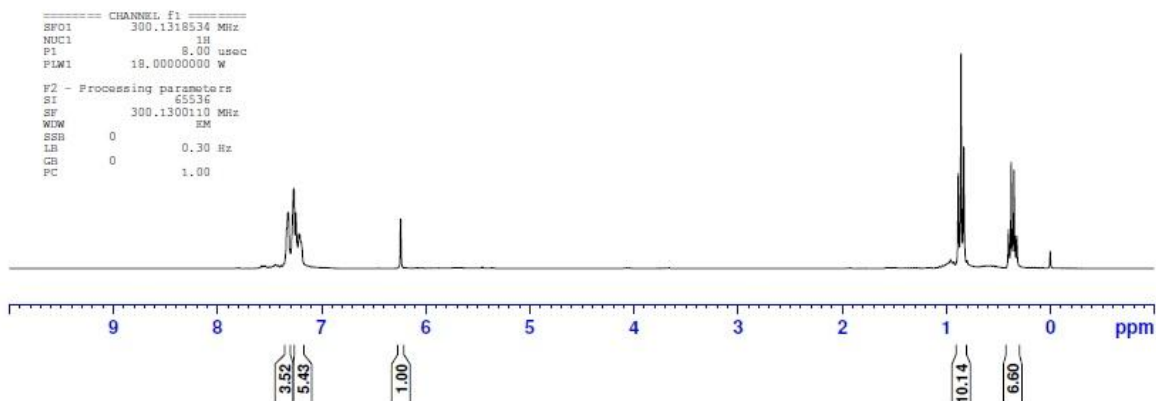

kdl-210

158.04  
143.65  
142.87  
139.54  
128.00  
127.77  
127.55  
127.39  
127.26  
126.79

77.45  
77.02  
76.60

7.56  
4.46

```
Current Data Parameters
NAME      kdl-TES-210
EXPNO     2
PROCNO    1

F2 - Acquisition Parameters
Date_     20151011
Time      13.11
INSTRUM   spect
PROBHD    5 mm DUL 13C-1
PULPROG   zgpg30
TD         65536
SOLVENT   CDCl3
NS         972
DS         4
SWH        18028.846 Hz
FIDRES     0.275998 Hz
AQ         1.8175317 sec
RG         209.09
DM         27.733 usec
DE         6.50 usec
TE         298.2 K
D1         2.00000000 sec
D11        0.03000000 sec
TDO        1

===== CHANNEL F1 =====
SFO1      300.1312605 MHz
NUC1      13C
P1         11.00 usec
PLW1      195.00000000 W

===== CHANNEL F2 =====
SFO2      300.1312605 MHz
NUC2      13C
CPDPRG2   waltz16
PCPD2     90.00 usec
PLW2      14.00000000 W
PLW3      0.17284000 W
PLW13     0.14000000 W

F2 - Processing parameters
SI         32768
SF         75.4677485 MHz
WDW        EM
SSB        0
LB         1.00 Hz
GB         0
PC         1.40
```

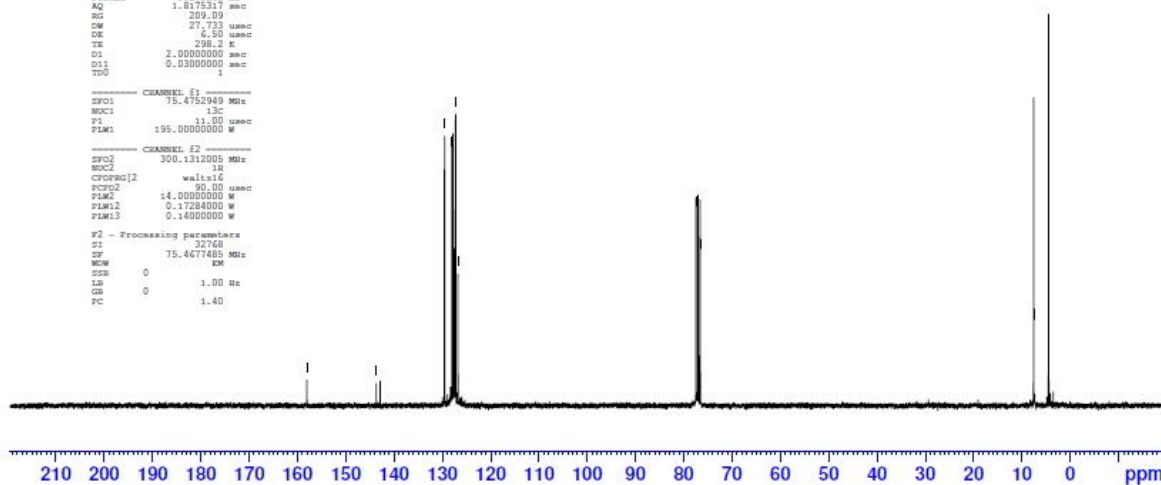

10b

kdl-187-h

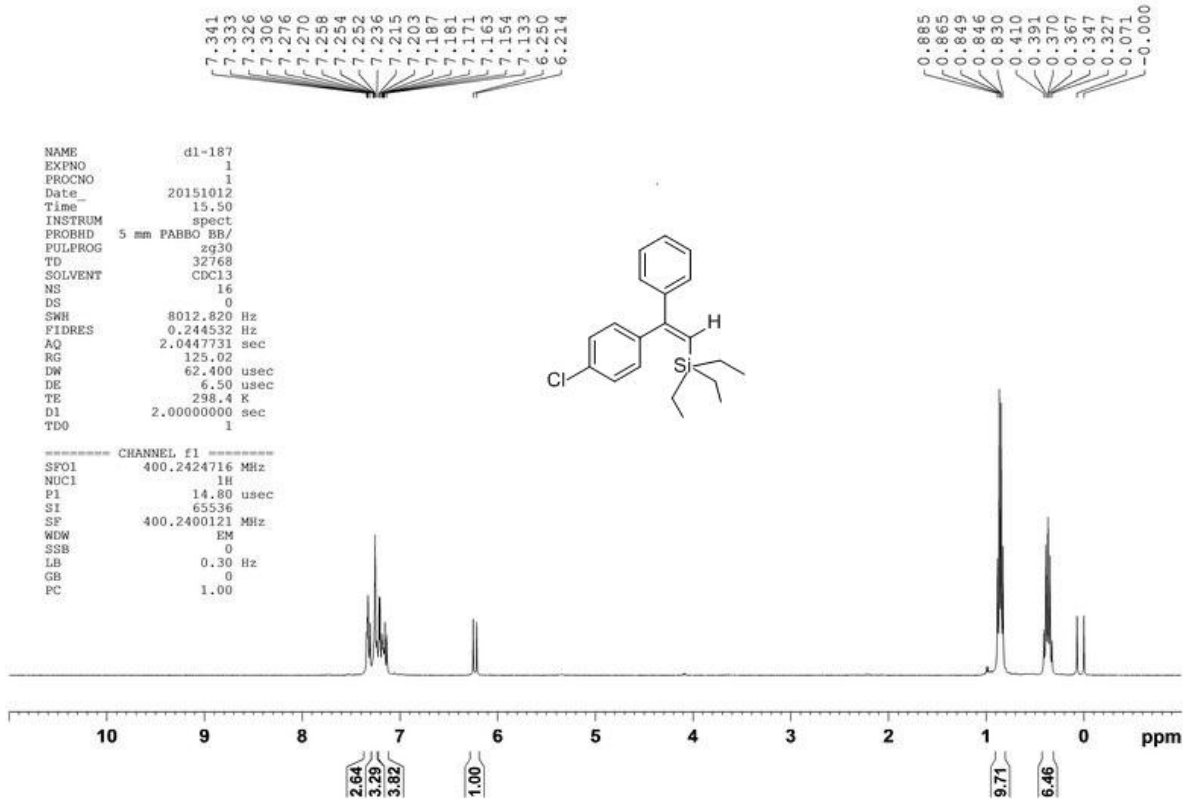

kdl-187-C

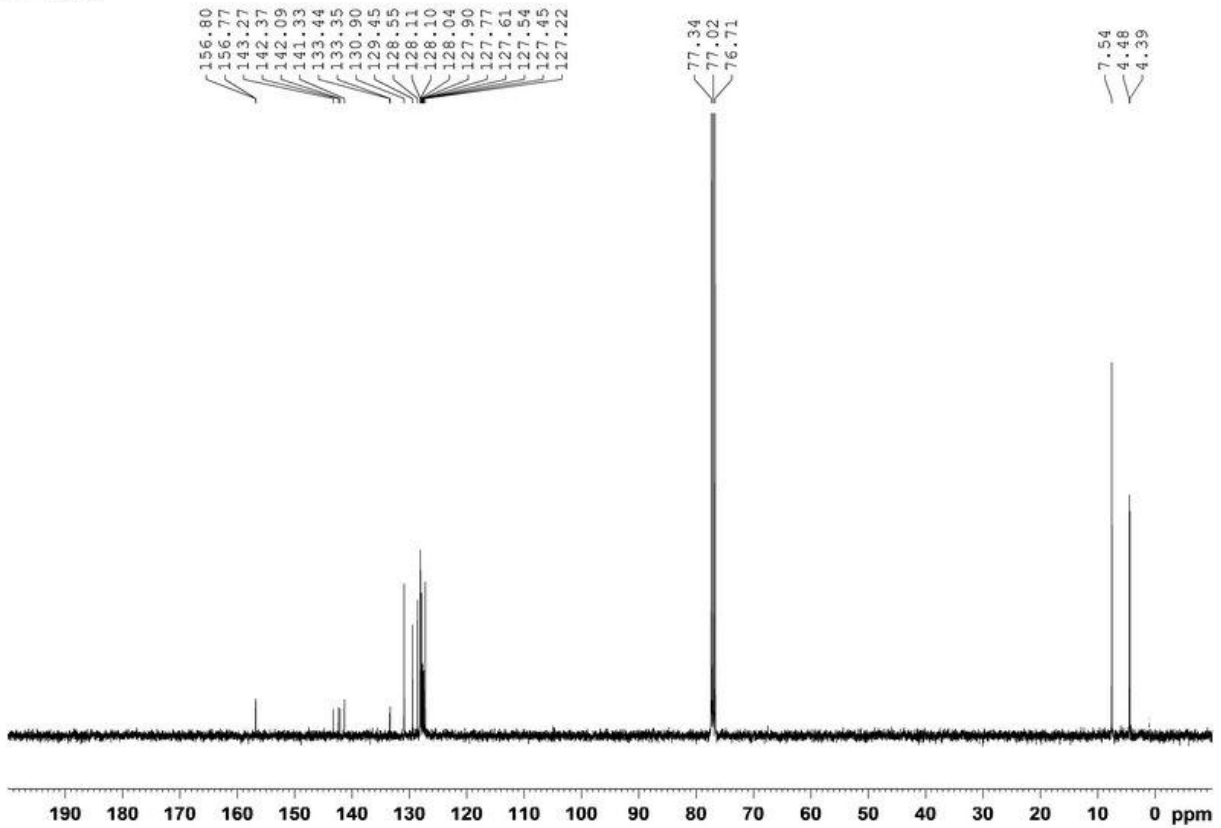

12b

kdl-214-THF-H

8.539  
8.525  
7.747  
7.741  
7.733  
7.729  
7.568  
7.565  
7.559  
7.554  
7.549  
7.543  
7.540  
7.490  
7.476  
7.473  
7.462  
7.457  
7.457  
7.444  
7.440  
7.429  
7.411  
7.411  
7.298  
7.286  
7.284  
7.183  
7.170  
7.167  
7.163  
7.158  
7.154  
7.152  
6.885  
6.867  
4.638  
4.622  
4.606  
4.030  
4.017  
4.013  
4.006  
4.001  
3.997  
3.984  
3.755  
3.747  
3.739  
3.731  
3.724  
2.373  
2.356  
2.349  
2.332  
2.090  
1.928  
1.921  
1.913  
1.905  
1.898  
1.798  
1.774

NAME kdl-214  
EXPNO 7  
PROCNO 1  
Date 20150418  
Time 18.53  
INSTRUM spect  
PROBHD 5 mm CFPBBO BB  
PULPROG zg30  
TD 65536  
SOLVENT CDCl3  
NS 16  
DS 2  
SWH 10000.000 Hz  
FIDRES 0.152588 Hz  
AQ 3.2768500 sec  
RG 31.72  
DW 50.000 usec  
DE 6.50 usec  
TE 298.0 K  
D1 1.00000000 sec  
TDO 1

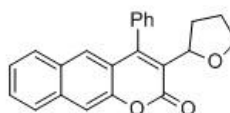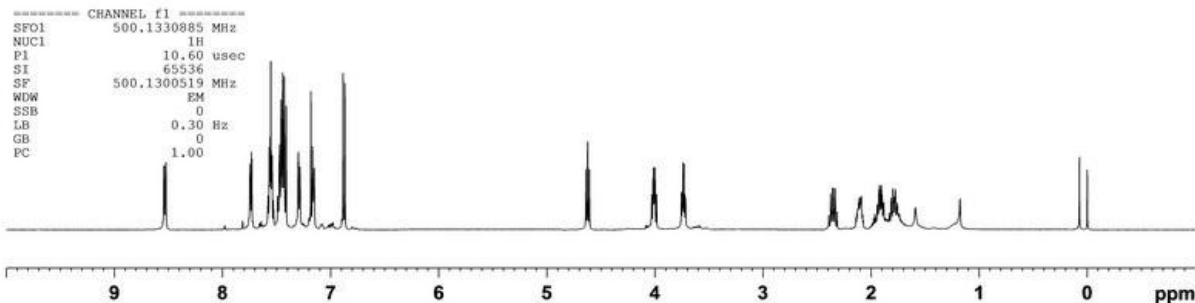

kdl-214-THF-C

158.43  
152.31  
149.03  
133.60  
133.42  
133.42  
127.85  
127.68  
127.66  
127.59  
127.51  
127.27  
126.56  
126.02  
124.25  
124.25  
122.61  
122.16  
121.87  
121.59  
114.53  
76.26  
76.00  
75.75  
75.55  
68.59  
29.12  
26.50

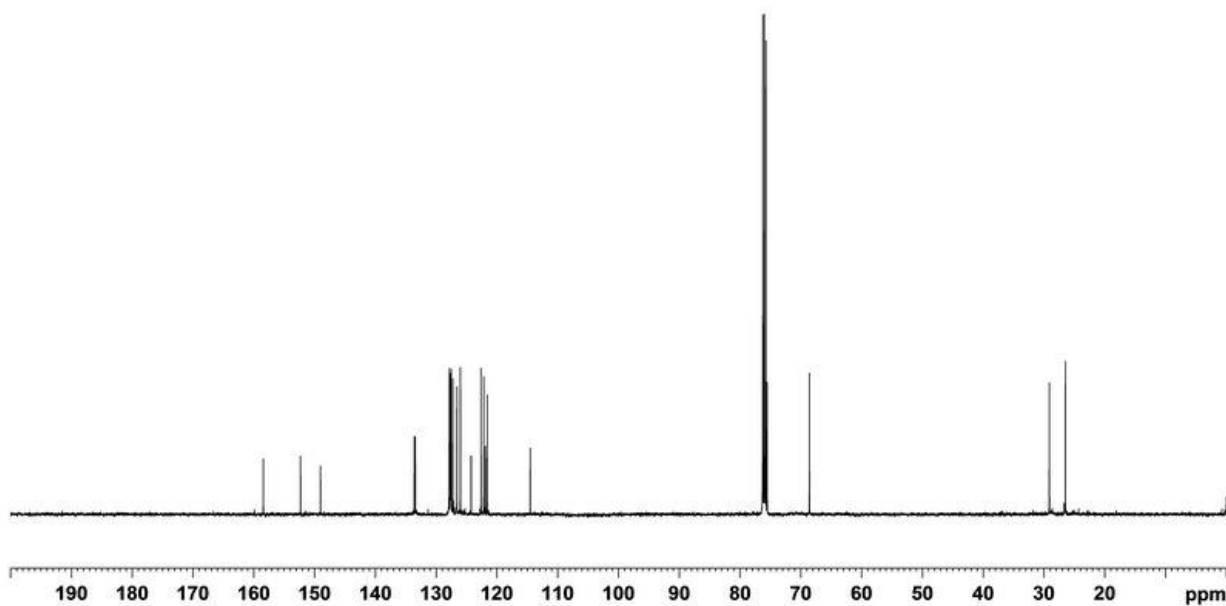

13b

kdl-214-DMA-H

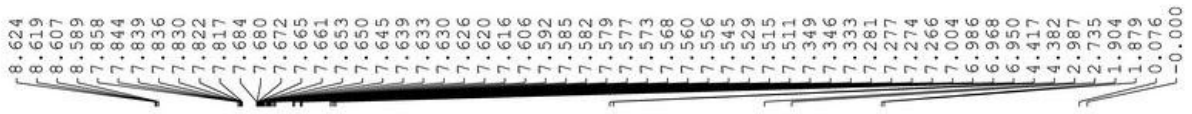

```

NAME          kdl-214
EXPNO         3
PROCNO        1
Date_         20150418
Time_         14.08
INSTRUM       spect
PROBHD        5 mm CFPBBO BB
PULPROG       zg30
TD            65536
SOLVENT       CDCl3
NS            16
DS            2
SWH           10000.000 Hz
FIDRES        0.152588 Hz
AQ            3.2768500 sec
RG            49.27
DW            50.000 usec
DE            6.50 usec
TE            298.0 K
D1            1.00000000 sec
TDO           1
  
```

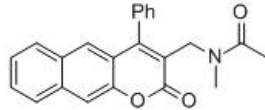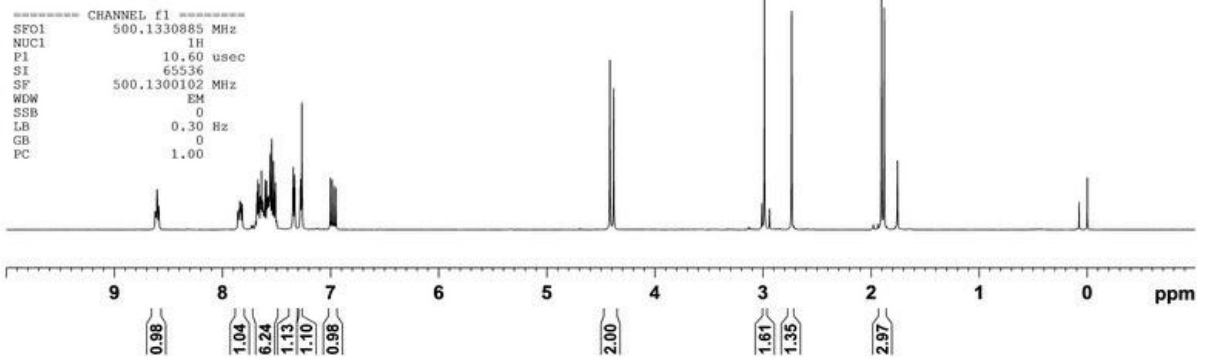

kdl-214-DMA-C

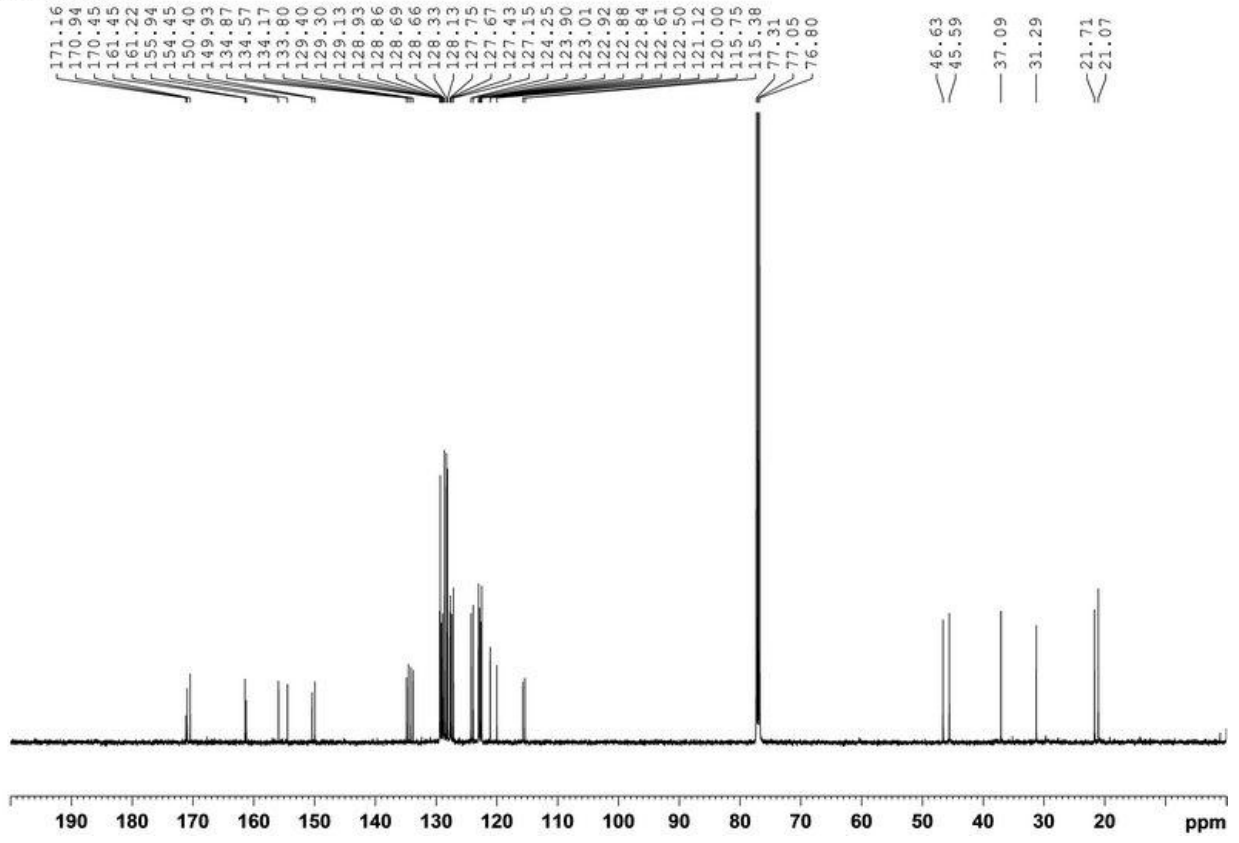



# 14b

kdl-214-cyh-guanhuan

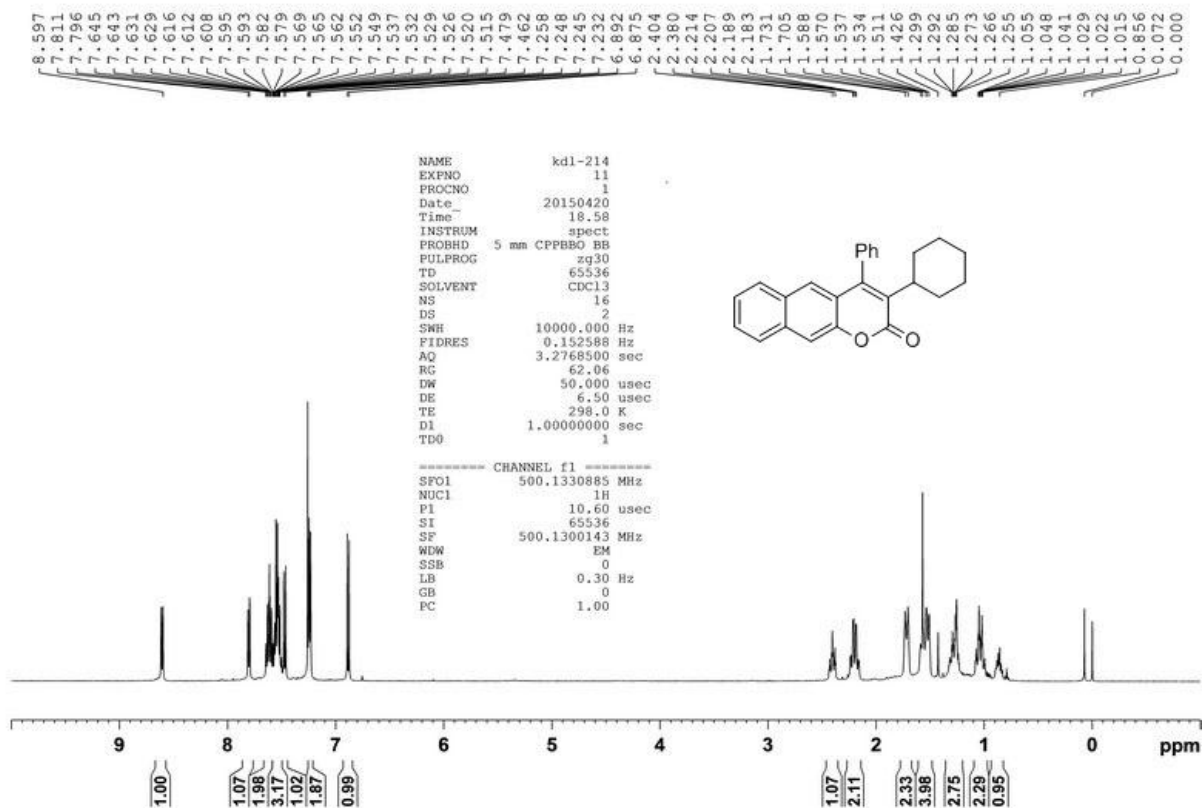

kdl-214-cyh-guanhuan-C

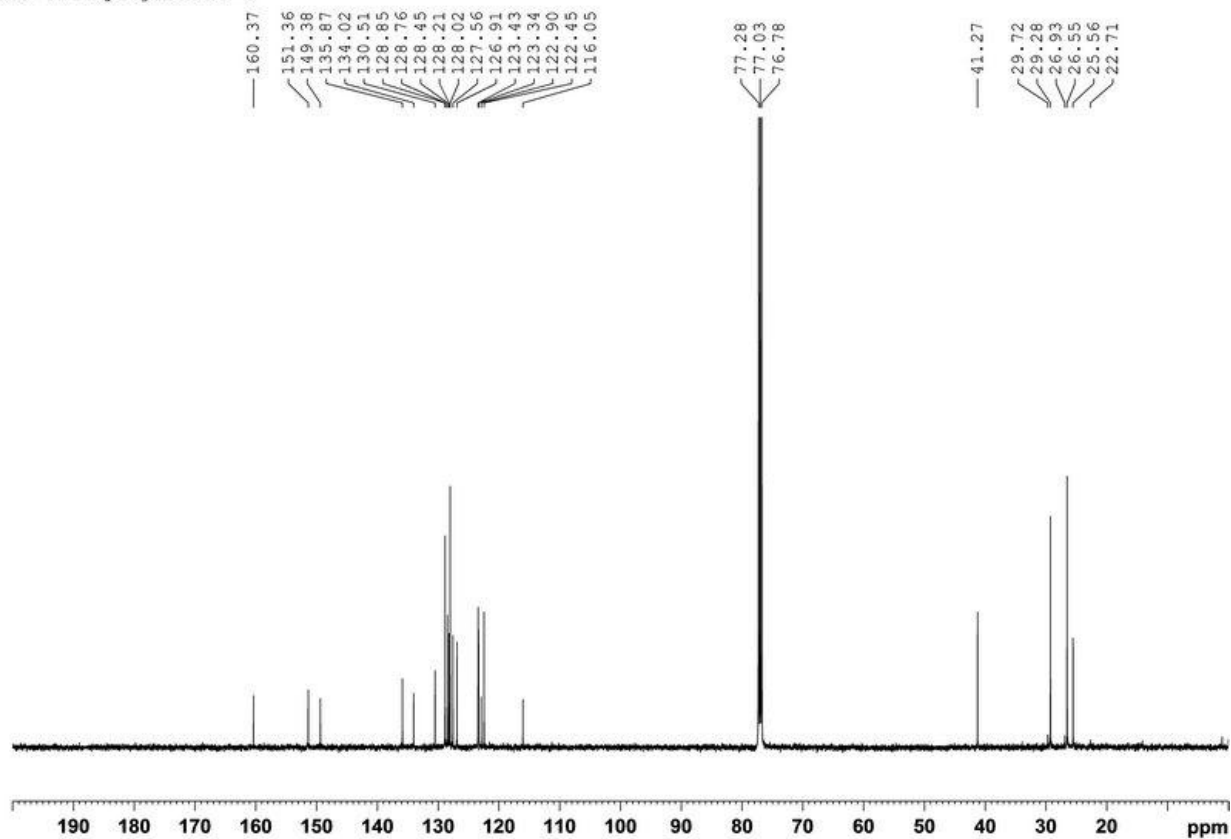

14a

dl-214-cyh-migration-

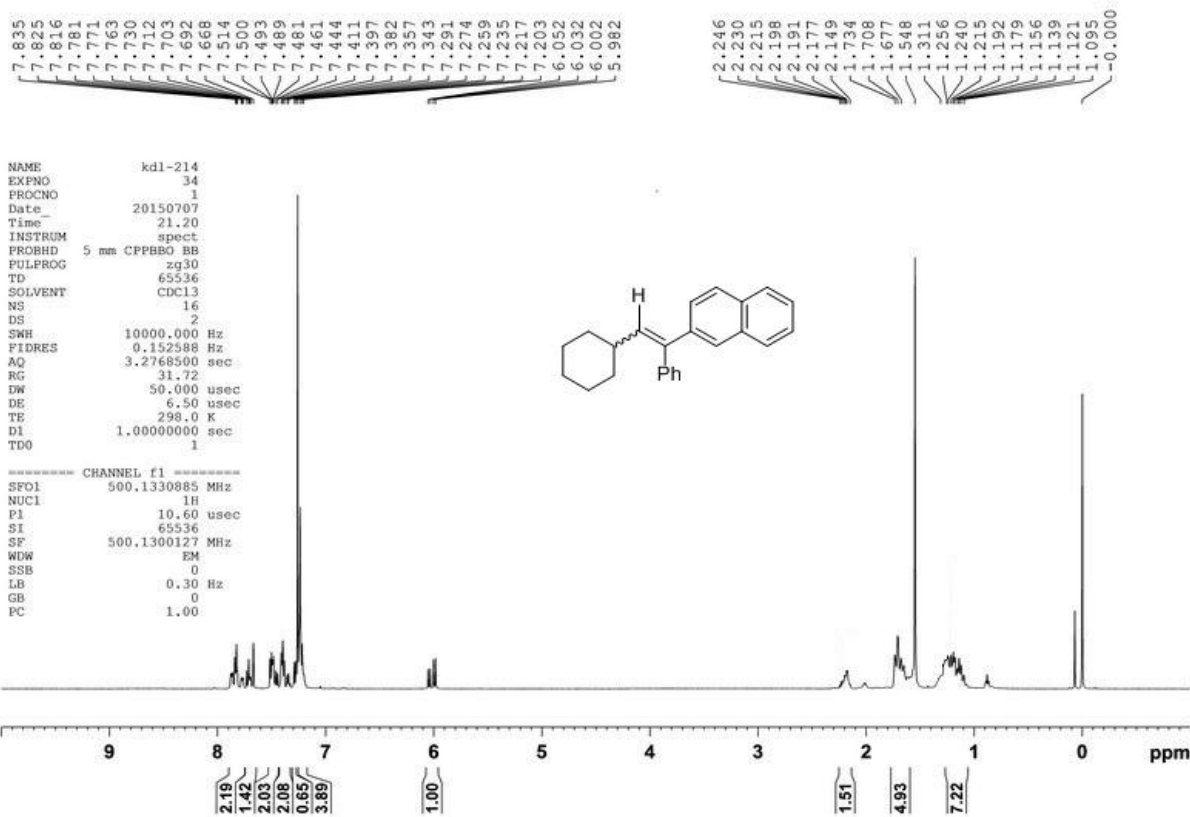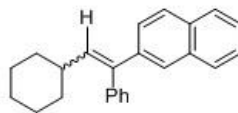

kdl-214-cyh-migration-c

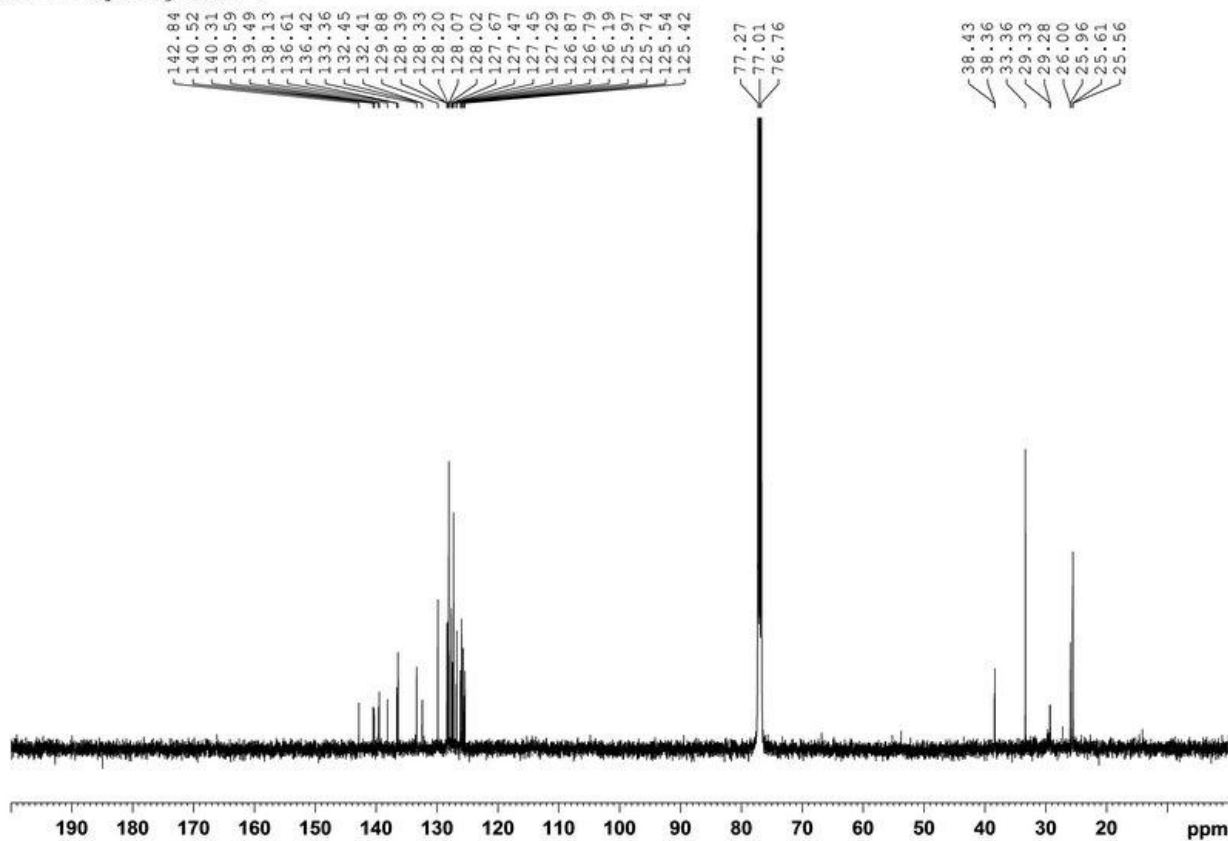

Supplement: c5ob02478a1.pdf [file c5ob02478a1.pdf]
